# Supplementary material for: Base-free synthesis of benchtop stable Ru( iii )–NHC complexes from RuCl 3 ·3H 2 O and their use as precursors for Ru( ii )–NHC complexes
Source: Royal Society of Chemistry journal article supplement (doi:10.1039/d3dt00243h), 2023-01-01
Supplement: d3dt00243h1.pdf [file d3dt00243h1.pdf]

## Supplementary Information

# Base-free synthesis of benchtop stable Ru(III)-NHC complexes from RuCl<sub>3</sub>·3H<sub>2</sub>O and their use as precursors for Ru(II)-NHC complexes

Nida Shahid, Rahul Kumar Singh, Navdeep Srivastava, Amrendra K. Singh\*

*Department of Chemistry, Indian Institute of Technology Indore, Indore 453552, India.*

*Email: aks@iiti.ac.in*

### Table of Contents

| S. No. | Contents                                                                                                              | Page No. |
|--------|-----------------------------------------------------------------------------------------------------------------------|----------|
| 1.     | <b>Figure S1.</b> <sup>1</sup> H NMR of [3-methyl-1-(pyridine-2-yl)imidazolium]I recorded in CDCl <sub>3</sub> .      | S4       |
| 2.     | <b>Figure S2.</b> <sup>13</sup> C NMR of [3-methyl-1-(pyridine-2-yl)imidazolium]I recorded in CDCl <sub>3</sub> .     | S5       |
| 3.     | <b>Figure S3.</b> <sup>1</sup> H NMR of [3- isopropyl-1-(pyridine-2-yl)imidazolium]I recorded in CDCl <sub>3</sub> .  | S6       |
| 4.     | <b>Figure S4.</b> <sup>13</sup> C NMR of [3- isopropyl-1-(pyridine-2-yl)imidazolium]I recorded in CDCl <sub>3</sub> . | S7       |
| 5.     | <b>Figure S5.</b> <sup>1</sup> H NMR of [3-methyl-1-(pyridine-2-yl)benzimidazolium]I recorded in CDCl <sub>3</sub> .  | S8       |
| 6.     | <b>Figure S6.</b> <sup>13</sup> C NMR of [3-methyl-1-(pyridine-2-yl)benzimidazolium]I recorded in CDCl <sub>3</sub> . | S9       |
| 7.     | <b>Figure S7.</b> LCMS of complex <b>1a</b> synthesized in presence of base (KOH).                                    | S10      |
| 8.     | <b>Figure S8.</b> LCMS of complex <b>1a</b> synthesized in presence of base K <sub>2</sub> CO <sub>3</sub>            | S11      |
| 9.     | <b>Figure S9.</b> LCMS and HRMS of <b>1a</b>                                                                          | S12      |
| 10.    | <b>Figure S10.</b> UV-Vis spectra of L <sup>1</sup> ·HI and <b>1a</b> recorded in MeCN                                | S13      |
| 11.    | <b>Figure S11.</b> IR spectra of L <sup>1</sup> ·HI and complex <b>1a</b> in solid state                              | S14      |
| 12.    | <b>Figure S12.</b> Plots of powder XRD patterns (simulated and experimental) of <b>1a</b>                             | S15      |
| 13.    | <b>Figure S13.</b> Plot of TGA of complex <b>1a</b>                                                                   | S16      |

|     |                                                                                                                                   |                |
|-----|-----------------------------------------------------------------------------------------------------------------------------------|----------------|
| 14. | <b>Figure S14.</b> LCMS of complex <b>1b</b> synthesized from $L^2 \cdot HBr$                                                     | <b>S17</b>     |
| 15. | <b>Figure S15.</b> LCMS of complex <b>1b</b> synthesized from $L^2 \cdot HI$                                                      | <b>S18</b>     |
| 16. | <b>Figure S16.</b> LCMS and HRMS of complex <b>1b</b> synthesized from $L^2 \cdot HI$                                             | <b>S19</b>     |
| 17. | <b>Figure S17.</b> UV-Vis spectra of $L^2 \cdot HI$ and <b>1b</b> recorded in MeCN                                                | <b>S20</b>     |
| 18. | <b>Figure S18.</b> Comparative plot for UV-Vis spectra of <b>1b</b> synthesized from $L^2 \cdot HI$ and $L^2 \cdot HBr$ , in MeCN | <b>S21</b>     |
| 19. | <b>Figure S19.</b> IR spectra of $L^2 \cdot HI$ and complex <b>1b</b> in solid state                                              | <b>S22</b>     |
| 20. | <b>Figure S20.</b> Plots of powder XRD patterns (simulated and experimental) of <b>1b</b>                                         | <b>S23</b>     |
| 21. | <b>Figure S21.</b> Plot of TGA of complex <b>1b</b>                                                                               | <b>S24</b>     |
| 22. | <b>Figure S22.</b> LCMS and HRMS of <b>1c</b>                                                                                     | <b>S25</b>     |
| 23. | <b>Figure S23.</b> UV-Vis spectra of $L^3 \cdot HI$ and <b>1c</b> recorded in MeCN                                                | <b>S26</b>     |
| 24. | <b>Figure S24.</b> IR spectra of $L^3 \cdot HI$ and complex <b>1c</b> in solid state                                              | <b>S27</b>     |
| 25. | <b>Figure S25.</b> Plot of TGA of complex <b>1c</b>                                                                               | <b>S28</b>     |
| 26. | <b>Figure S26.</b> Plot of molar extinction coefficients of complexes <b>1a–c</b> recorded in MeCN                                | <b>S29</b>     |
| 27. | <b>Figure S27.</b> LCMS and HRMS of <b>2a</b>                                                                                     | <b>S30</b>     |
| 28. | <b>Figure S28-29.</b> $^1H$ and $^{31}P$ spectra of <b>2a</b> in $DMSO-d_6$                                                       | <b>S31–S32</b> |
| 29. | <b>Figure S30.</b> LCMS and HRMS of <b>2b</b>                                                                                     | <b>S33</b>     |
| 30. | <b>Figure S31-32.</b> $^1H$ and $^{31}P$ NMR spectra of <b>2b</b> in $CD_3CN$                                                     | <b>S34–S35</b> |
| 31. | <b>Figure S33.</b> LCMS and HRMS of <b>2c</b>                                                                                     | <b>S36</b>     |
| 32. | <b>Figure S34-35.</b> $^1H$ and $^{31}P$ NMR spectra of <b>2c</b> in $DMSO-d_6$ .                                                 | <b>S37–S38</b> |
| 33. | <b>Figure S36.</b> LCMS and HRMS of complex <b>3a</b>                                                                             | <b>S39</b>     |
| 34. | <b>Figure S37-39.</b> $^1H$ , $^{13}C$ , and $^{31}P$ NMR spectra of complex <b>3a</b> in $DMSO-d_6$                              | <b>S40–S42</b> |
| 35. | <b>Figure S40.</b> LCMS and HRMS of complex <b>3b</b>                                                                             | <b>S43</b>     |
| 36. | <b>Figure S41-43.</b> $^1H$ , $^{13}C$ , and $^{31}P$ NMR spectra of complex <b>3b</b> in $DMSO-d_6$                              | <b>S44–S46</b> |
| 37. | <b>Figure S44.</b> LCMS and HRMS of complex <b>3c</b>                                                                             | <b>S47</b>     |

|            |                                                                                                                            |                |
|------------|----------------------------------------------------------------------------------------------------------------------------|----------------|
| <b>38.</b> | <b>Figure S45-47.</b> $^1\text{H}$ , $^{13}\text{C}$ , and $^{31}\text{P}$ NMR spectra of complex <b>3c</b> in DMSO- $d_6$ | <b>S48–S50</b> |
| <b>39.</b> | <b>Figure S48.</b> ORTEP diagram for complex <b>3a</b>                                                                     | <b>S51</b>     |
| <b>40.</b> | <b>Table S1.</b> Crystallographic parameters of complexes <b>1a</b> , <b>1b</b> , <b>2c</b> , and <b>3a</b>                | <b>S52</b>     |
| <b>41.</b> | <b>Table S2.</b> Selected bond lengths and angles for the complexes <b>1a</b> , <b>1b</b> , <b>2c</b> , and <b>3a</b>      | <b>S53</b>     |
| <b>42.</b> | XYZ Coordinates for the optimized geometry of $\text{H}_2\text{O}$ and MeCN coordinated isomers of complex <b>1a</b>       | <b>S54–S59</b> |

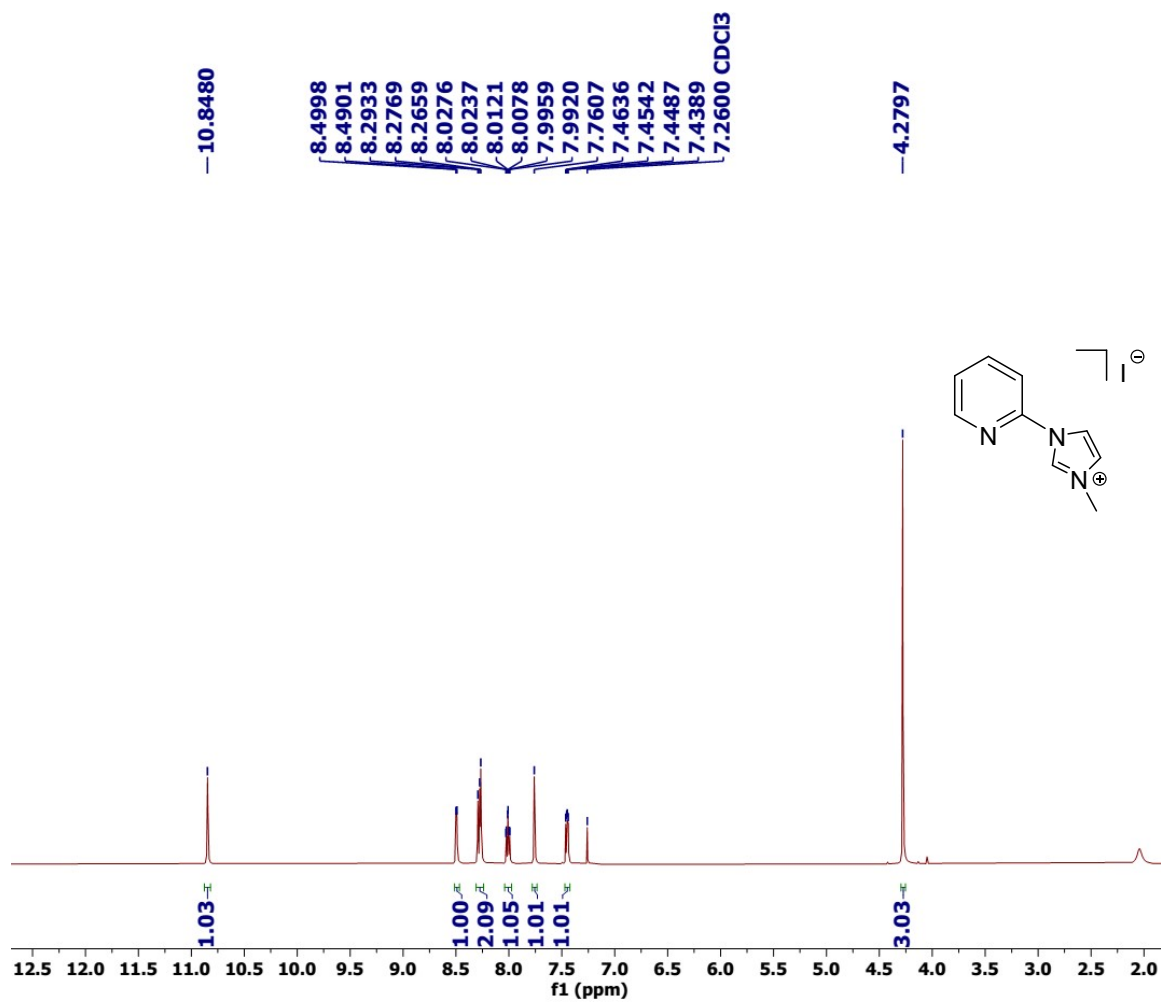

**Figure S1.** <sup>1</sup>H NMR of [3-methyl-1-(pyridin-2-yl)imidazolium]I recorded in CDCl<sub>3</sub> at RT.

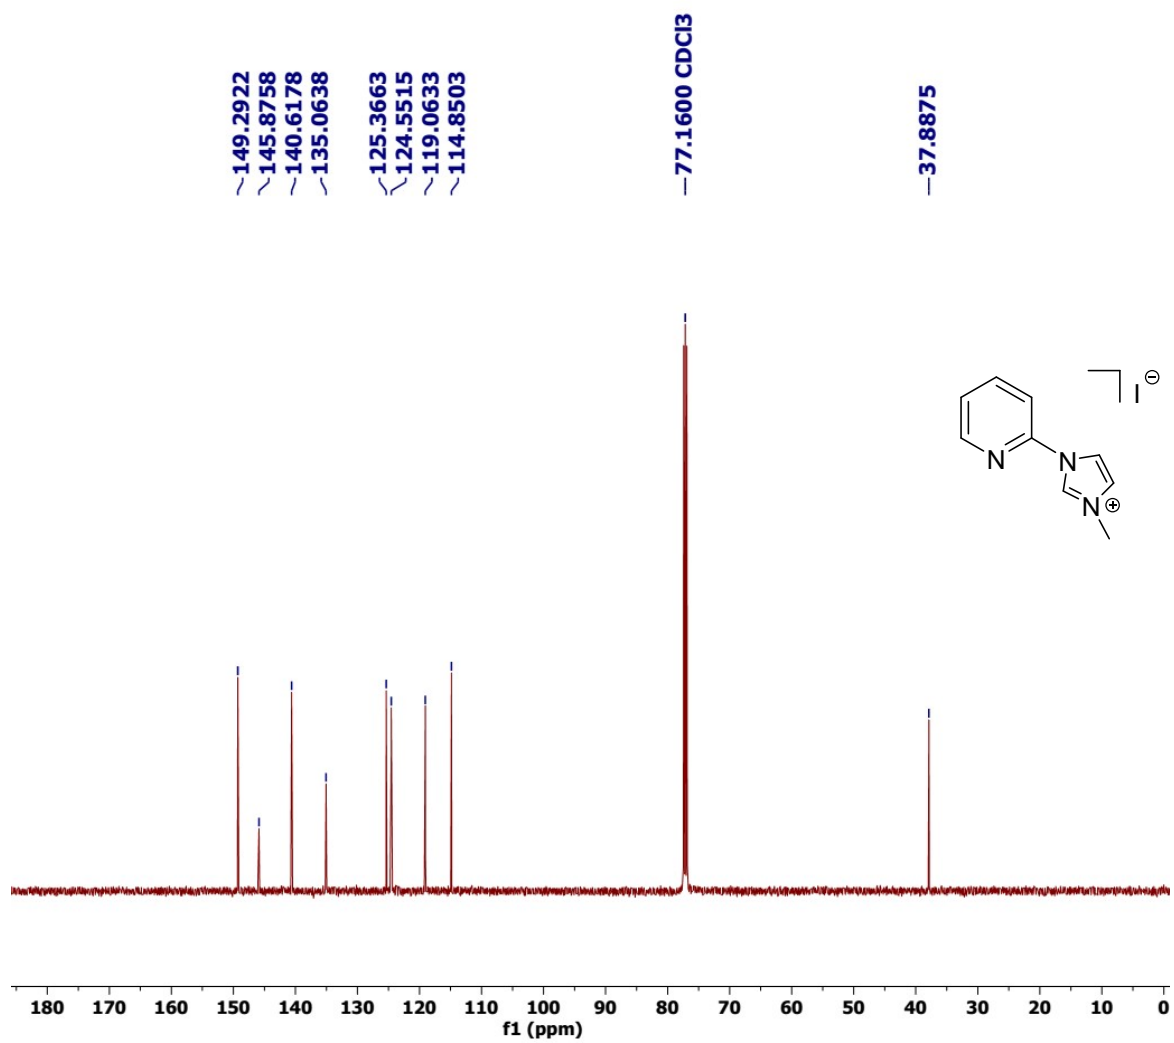

**Figure S2.** <sup>13</sup>C NMR of [3-methyl-1-(pyridin-2-yl)imidazolium]I recorded in CDCl<sub>3</sub> at RT.

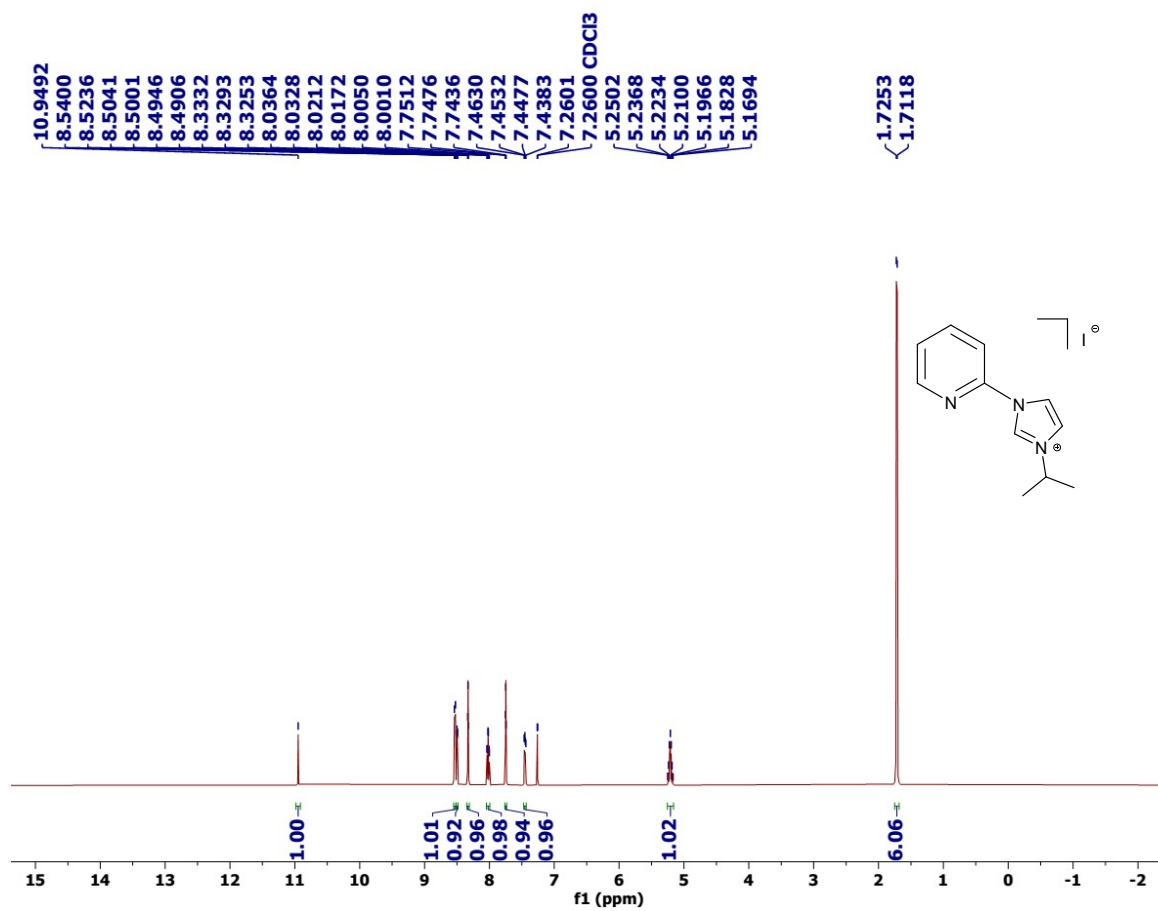

**Figure S3.**  $^1\text{H}$  NMR of [3-isopropyl-1-(pyridine-2-yl)imidazolium]Br recorded at a fixed concentration (0.02 mol/L) in  $\text{CDCl}_3$  at RT.

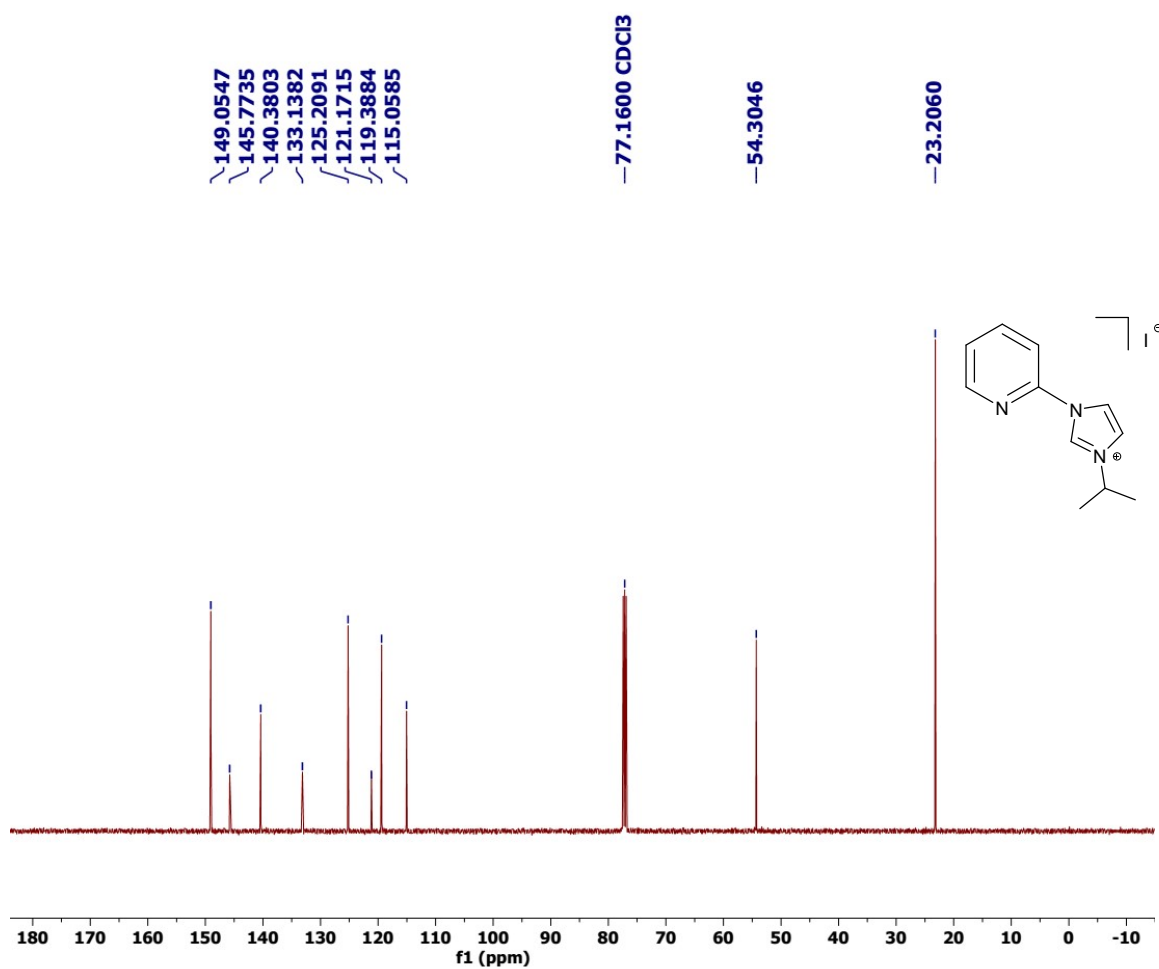

**Figure S4.**  $^{13}\text{C}$  NMR of [3-isopropyl-1-(pyridine-2-yl)imidazolium] $\text{Br}$  recorded at a fixed concentration (0.02 mol/L) in  $\text{CDCl}_3$  at RT.

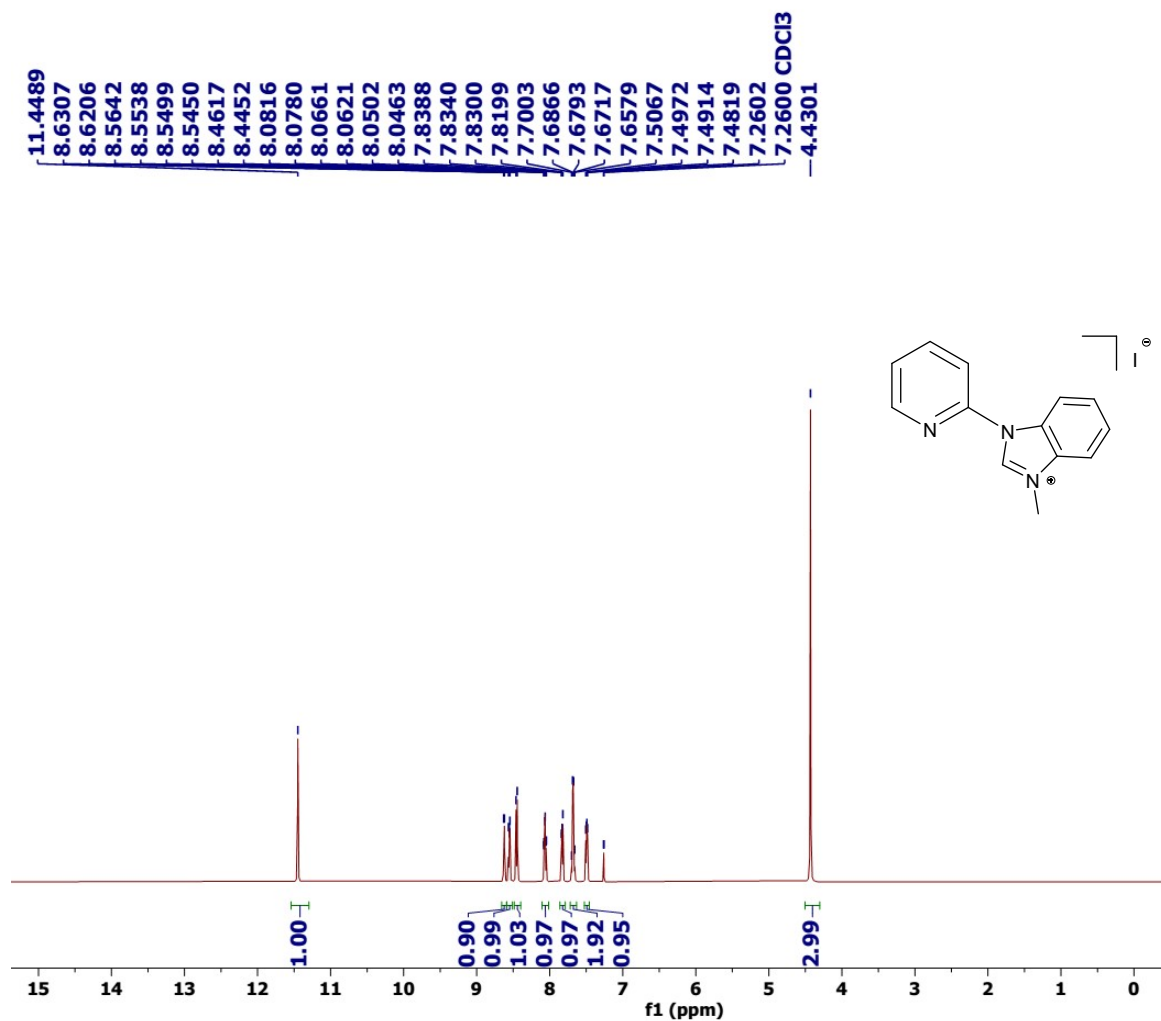

**Figure S5.**  $^1\text{H}$  NMR of [3-methyl-1-(pyridin-2-yl)benzimidazolium] $\text{I}$  recorded in  $\text{CDCl}_3$  at RT.



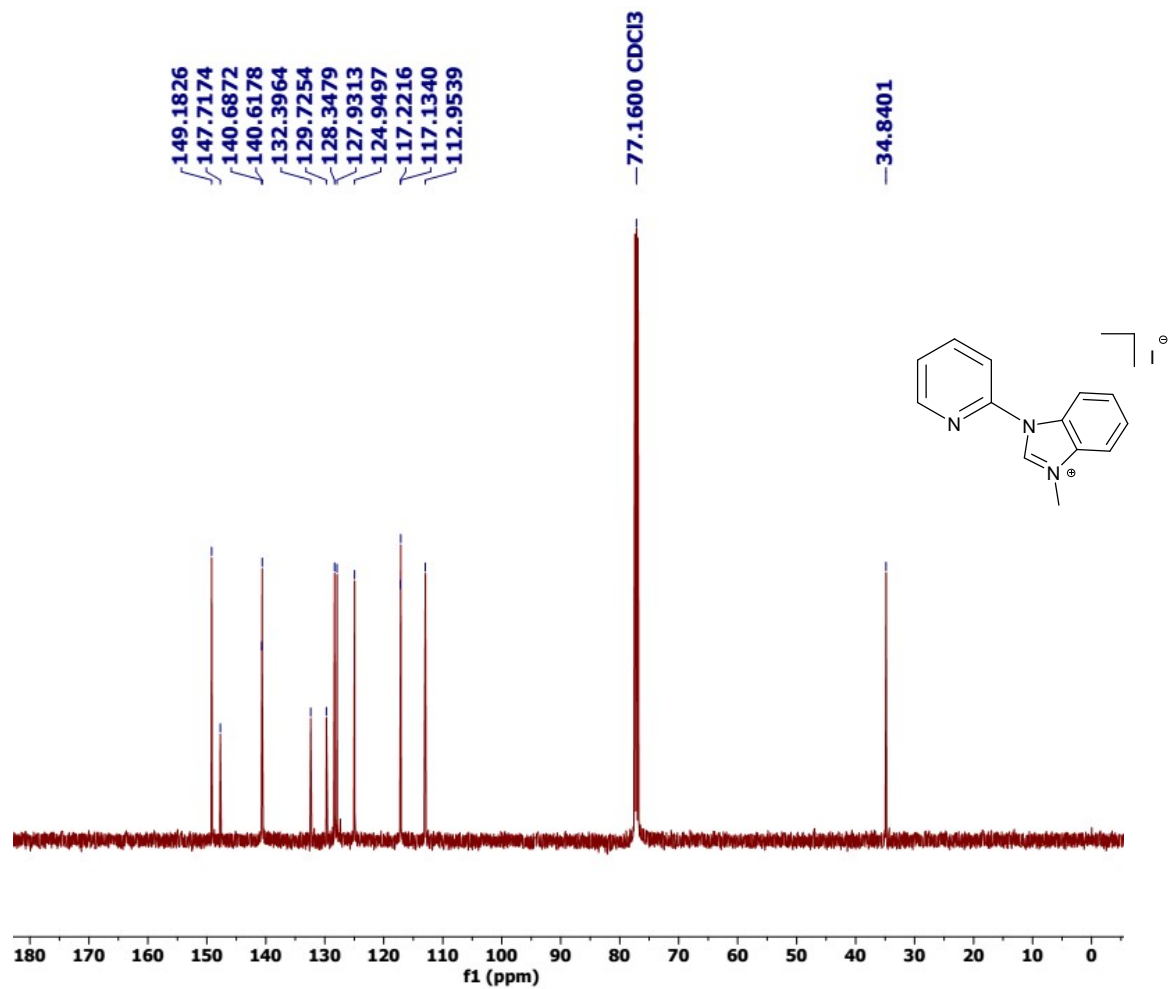

**Figure S6.**  $^{13}\text{C}$  NMR of [3-methyl-1-(pyridin-2-yl)benzimidazolium]I recorded in  $\text{CDCl}_3$  at RT.

## Generic Display Report

### Analysis Info

|               |                                                     |                  |                     |
|---------------|-----------------------------------------------------|------------------|---------------------|
| Analysis Name | F:\PROJECT 3\MASS\m chem aks-nsh-KOP_RB1_01_16632.d | Acquisition Date | 21-04-2022 11:38:51 |
| Method        | 2. LCMS tune wide ACN.m                             | Operator         | IIT Indore          |
| Sample Name   | m chem aks-nsh-KOP                                  | Instrument       | micrOTOF-Q          |
| Comment       |                                                     |                  |                     |

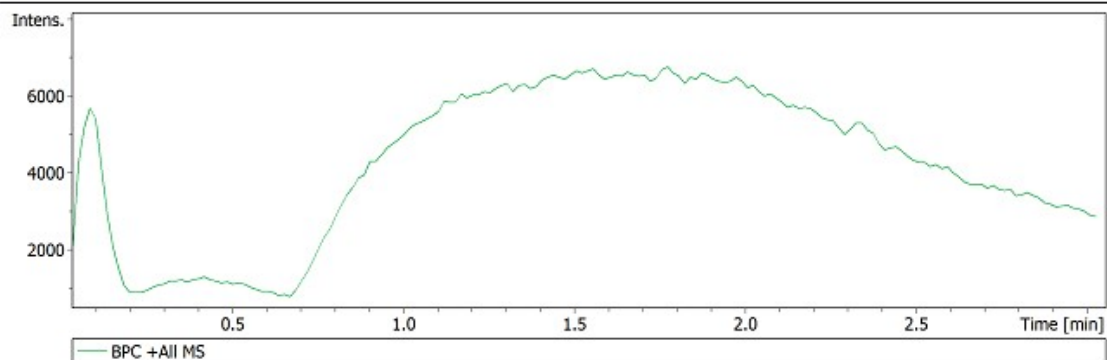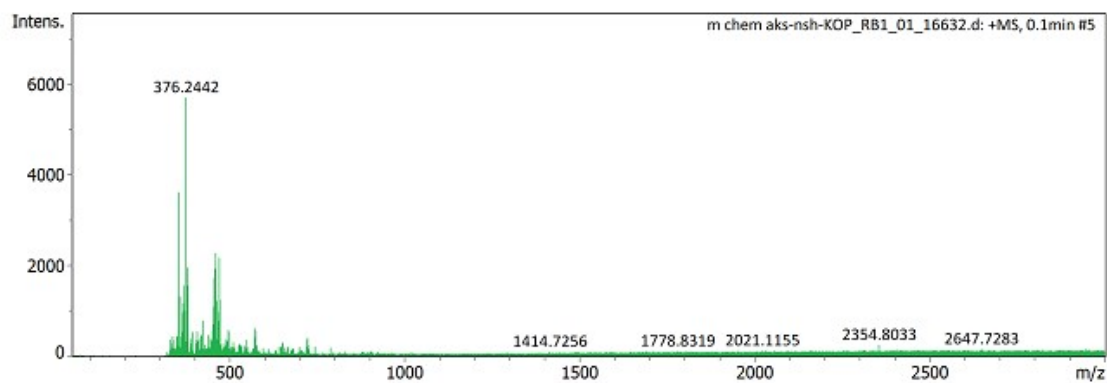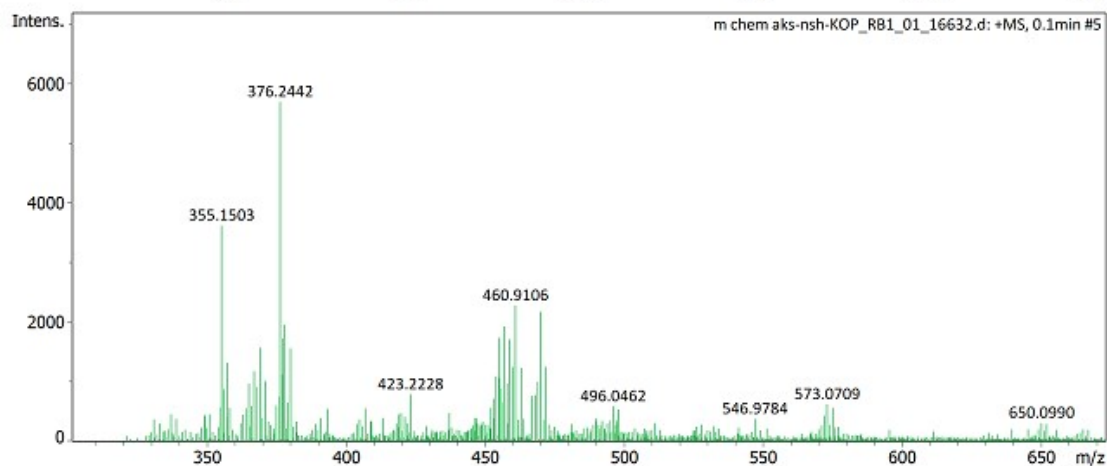

**Figure S7.** LCMS of attempted synthesis of **1a** in presence of base (KOH) showing no molecular ion peak for the desired parent complex **1a**.



## Generic Display Report

**Analysis Info**  
Analysis Name F:\PROJECT 3\MASS\m chem AKS-NSH-1A-2PR-KP\_RC7\_01\_16577.d Acquisition Date 20-04-2022 13:13:45  
Method 2. LCMS tune wide ACN.m Operator IIT Indore  
Sample Name m chem AKS-NSH-1A-2PR-KP Instrument microTOF-Q  
Comment

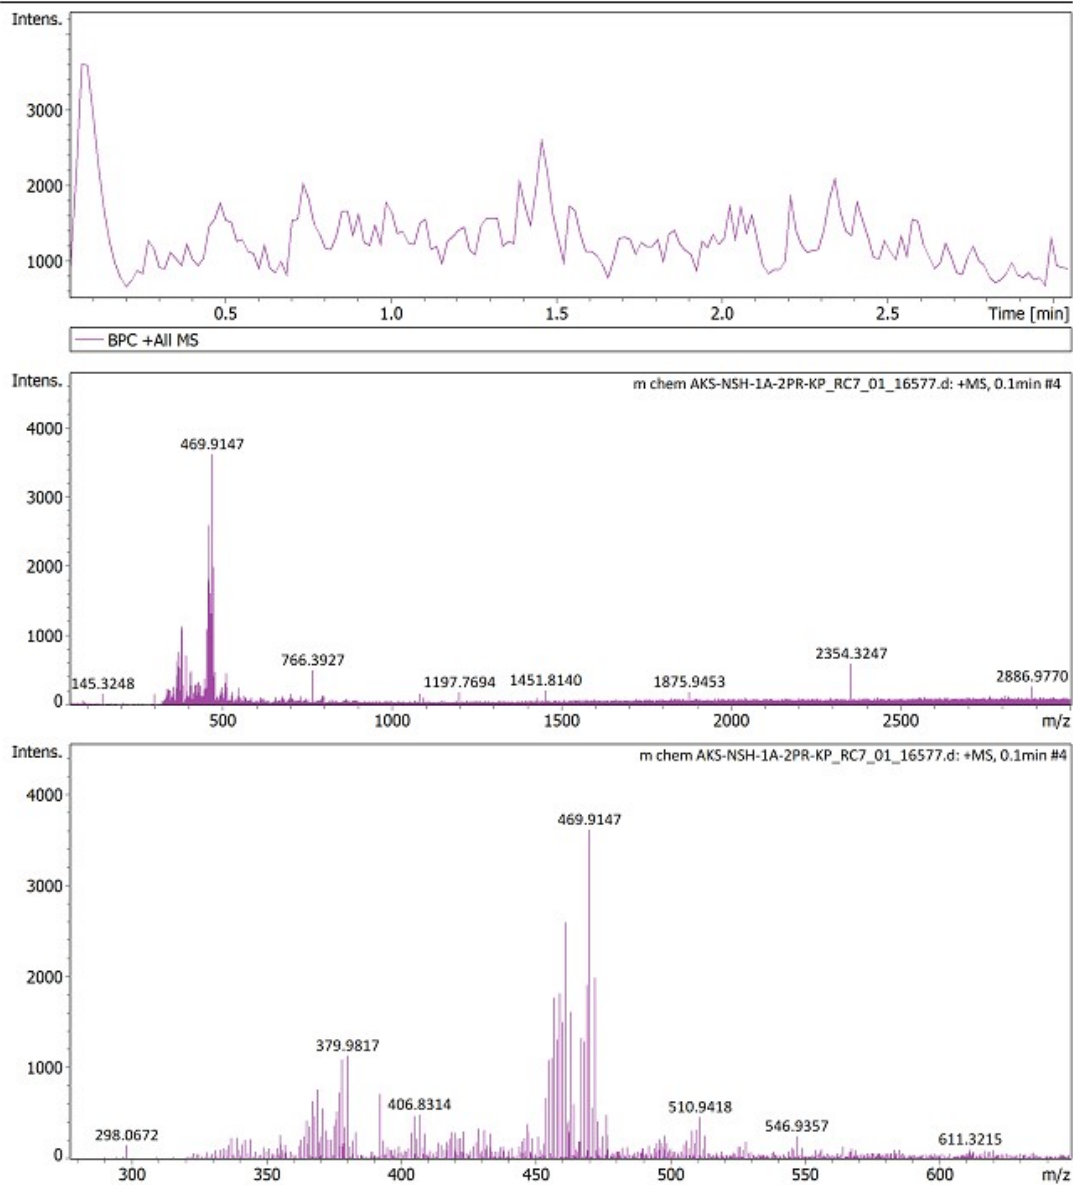

Bruker Compass DataAnalysis 5.1 printed: 15-09-2022 16:40:18 by: IIT INDORE Page 1 of 1

**Figure S8.** LCMS of attempted synthesis of **1a** in presence of base ( $K_2CO_3$ ) showing no molecular ion peak for the desired parent complex **1a**.

## Display Report

### Analysis Info

|               |                                                             |                  |                            |
|---------------|-------------------------------------------------------------|------------------|----------------------------|
| Analysis Name | F:\Project 2\HRMS\h chem aks-nsh-164-2_RE2_01_5541.d - Copy | Acquisition Date | 04-09-2019 14:00:17        |
| Method        | 7. lcms tune low meoh.m                                     | Operator         | Ghanashyam Bhavsar         |
| Sample Name   | m chem aks-nsh-164-2                                        | Instrument       | micrOTOF-Q II 228888.10348 |
| Comment       |                                                             |                  |                            |

### Acquisition Parameter

|             |            |                       |           |                  |           |
|-------------|------------|-----------------------|-----------|------------------|-----------|
| Source Type | ESI        | Ion Polarity          | Positive  | Set Nebulizer    | 2.0 Bar   |
| Focus       | Not active | Set Capillary         | 4500 V    | Set Dry Heater   | 250 °C    |
| Scan Begin  | 50 m/z     | Set End Plate Offset  | -500 V    | Set Dry Gas      | 5.5 l/min |
| Scan End    | 3000 m/z   | Set Collision Cell RF | 150.0 Vpp | Set Divert Valve | Waste     |

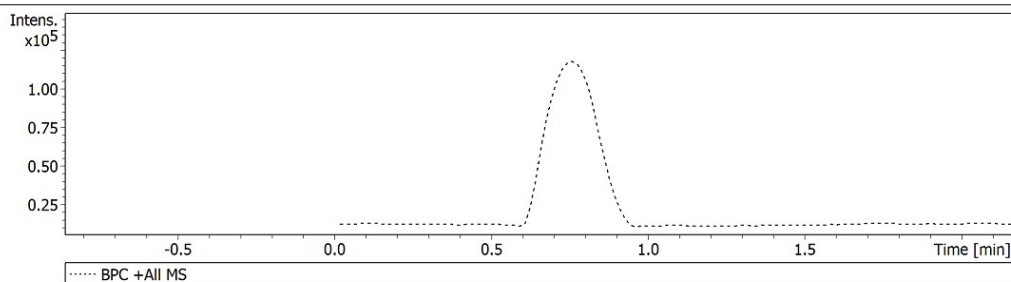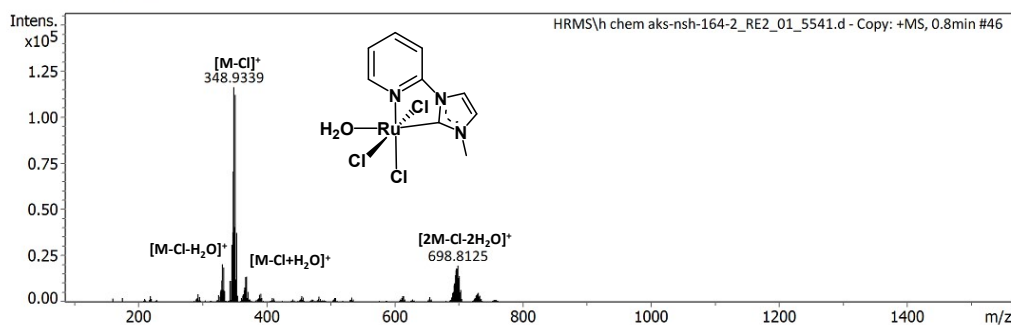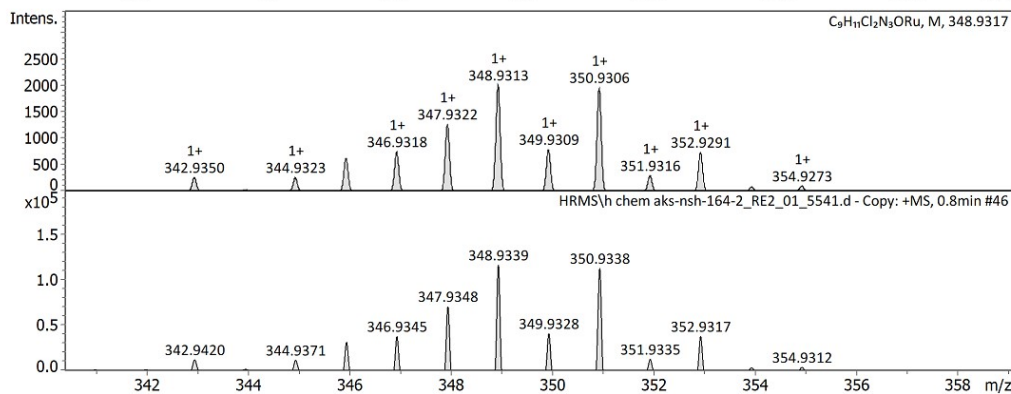

**Figure S9.** LCMS and HRMS of complex **1a** obtained in absence of base.

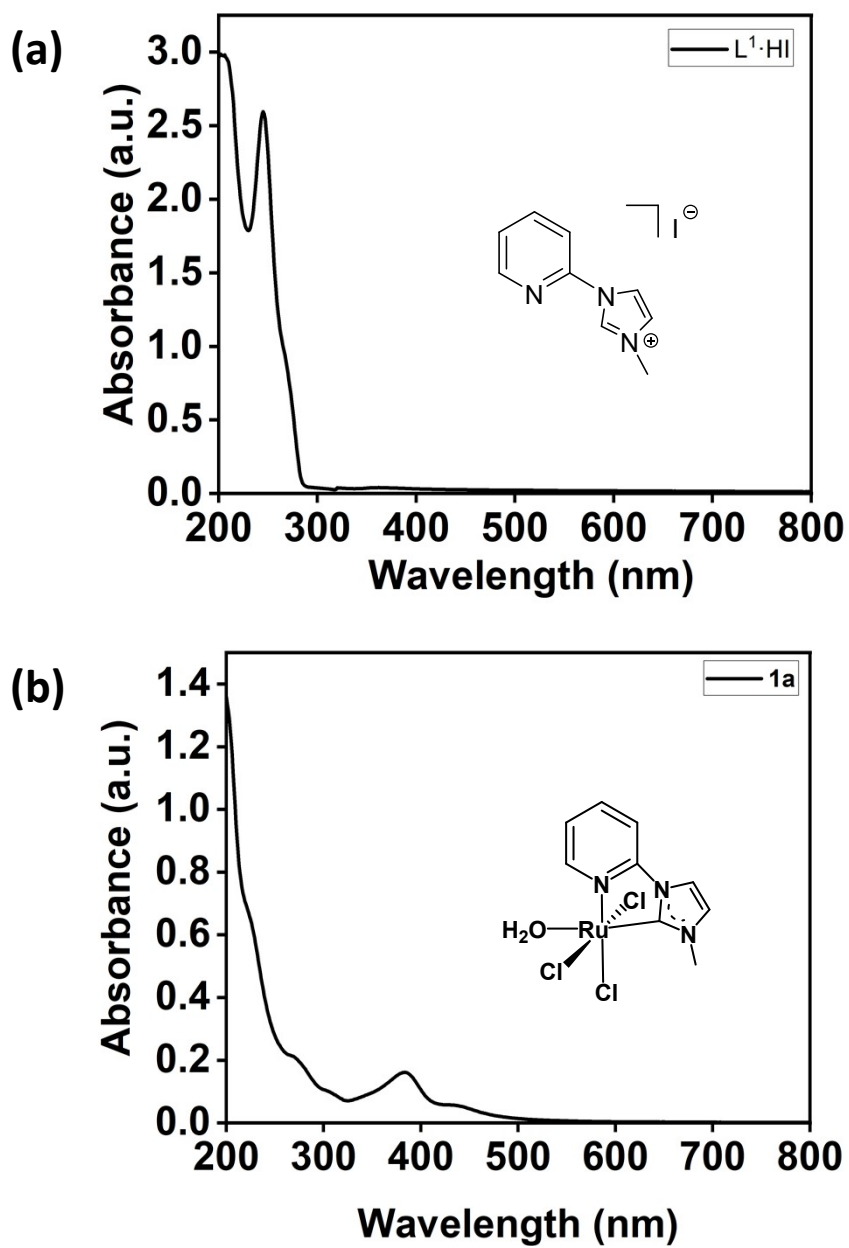

**Figure S10.** UV-Vis spectra of (a) free ligand  $L^1 \cdot HI$  and (b) its respective complex **1a** recorded in MeCN

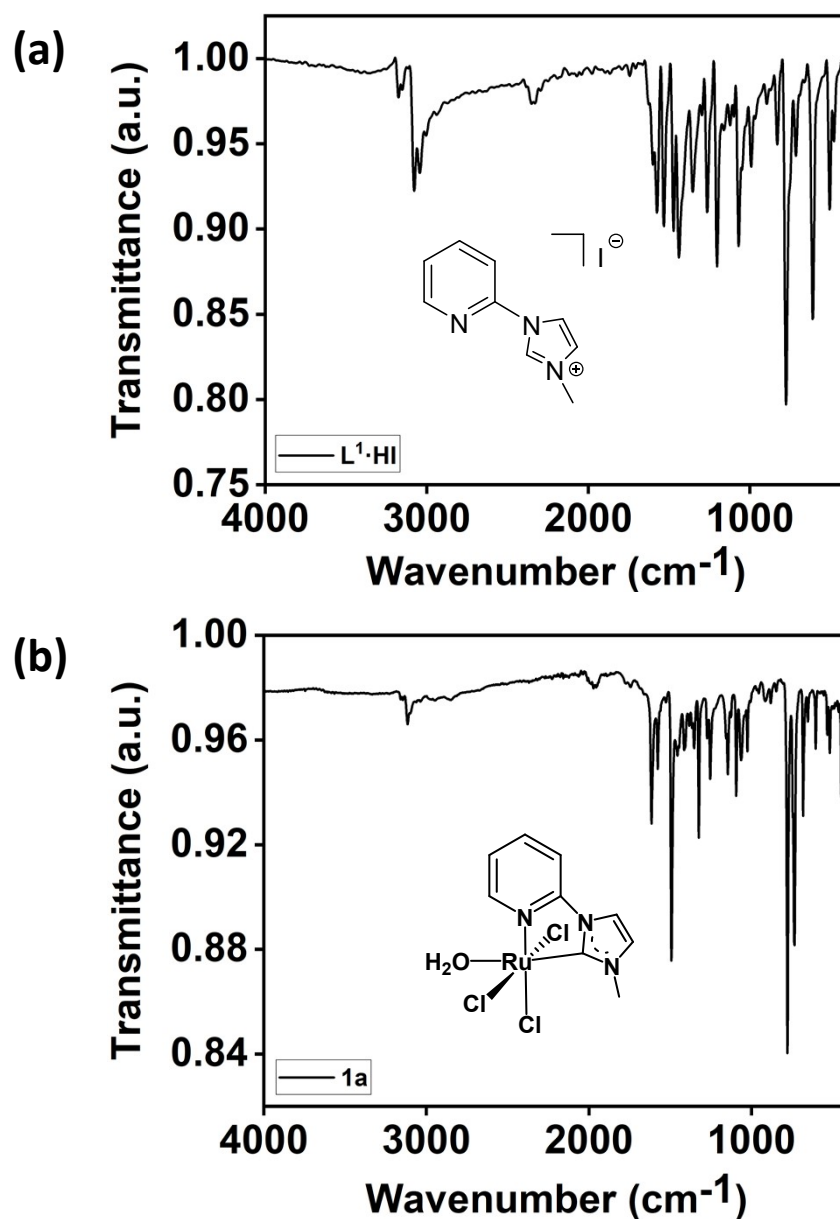

Figure S11. IR spectra of (a)  $L^1 \cdot HI$  and (b) its respective complex **1a** in solid state.

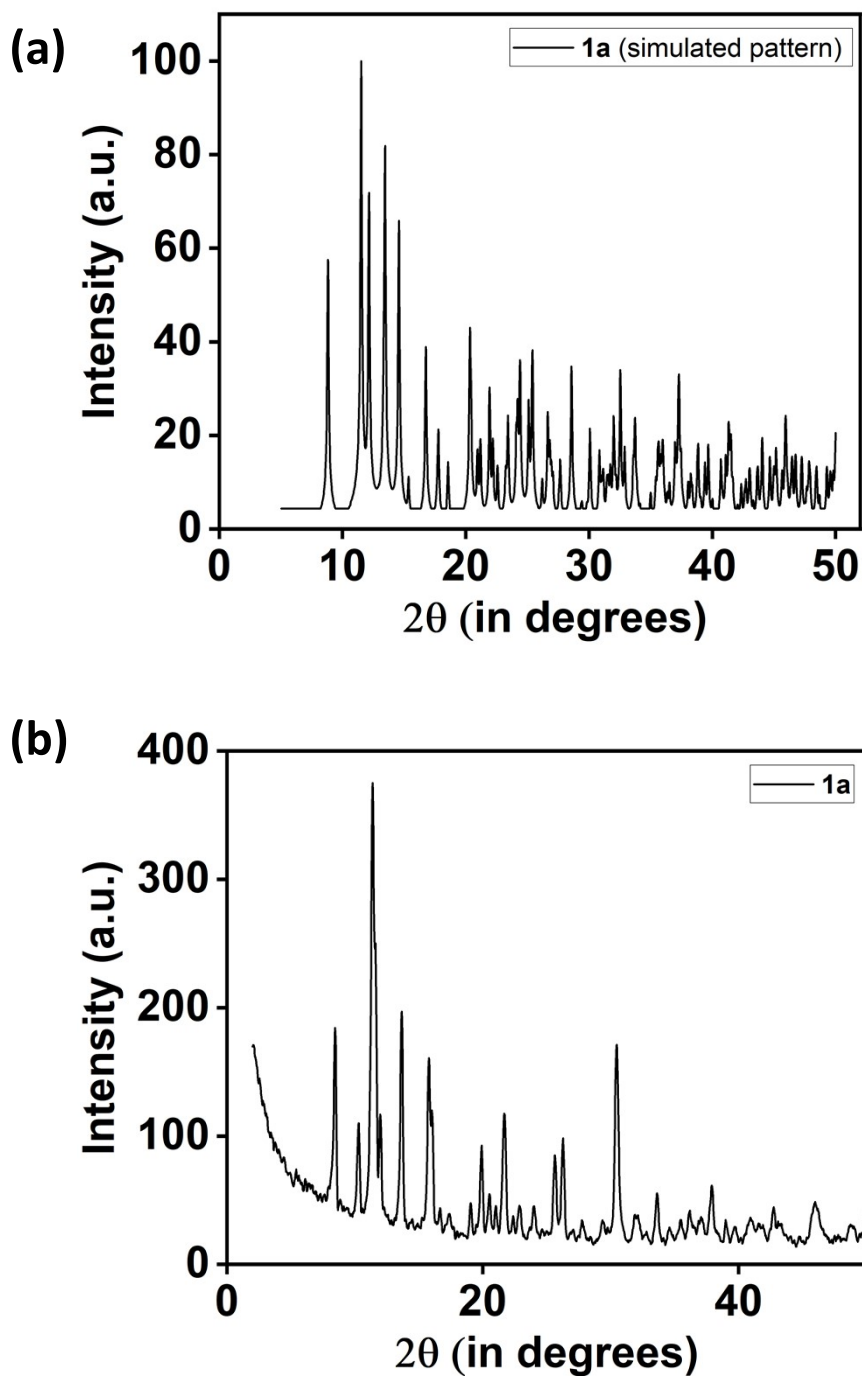

**Figure S12.** Plots of powder XRD (a) simulated pattern obtained from molecular structure **1a-MeCN** (b) pattern observed experimentally for complex **1a**. Change in position and intensity of signals from the simulated pattern arise due to the existence of solvent molecule (acetonitrile) in the unit cell.



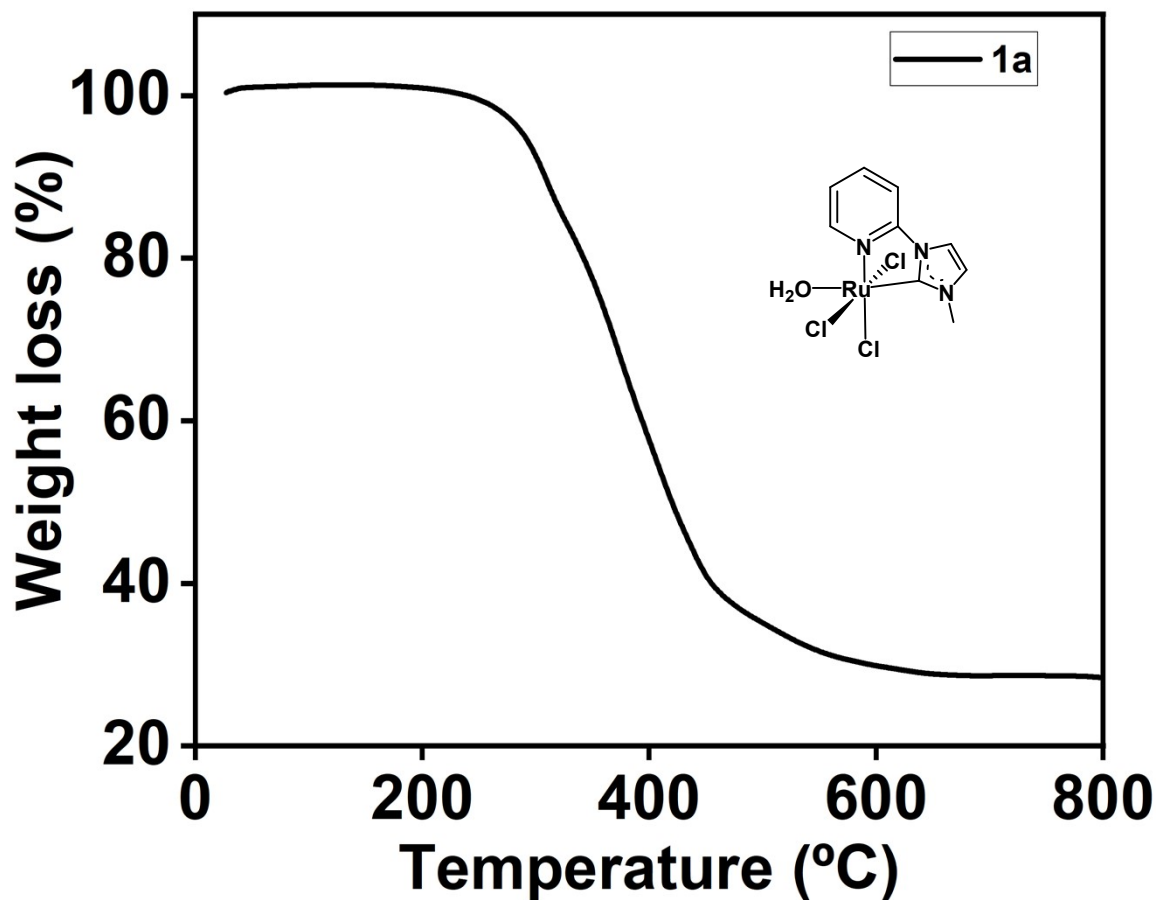

**Figure S13.** Plot of TGA for complex **1a**. The first derivative curve w.r.t. temperature has revealed that no weight loss was observed up to 300 °C. Whereas the sequential loss of H<sub>2</sub>O molecule and three chlorides was found to occur between 200–450 °C. Total weight loss was observed to be 71.99% and 28.72% of the compound was remained as residues after complete analysis.



## Generic Display Report

### Analysis Info

Analysis Name C:\DRIVE F\PROJECT 1\ISO MASS\m chem aks-nsh-isop2\_RA8\_01\_3928.d  
Method 7. LCMS tune low MeOH.m  
Sample Name m chem aks-nsh-isop2  
Comment

Acquisition Date 03-03-2021 13:26:35  
Operator IIT Indore  
Instrument micrOTOF-Q

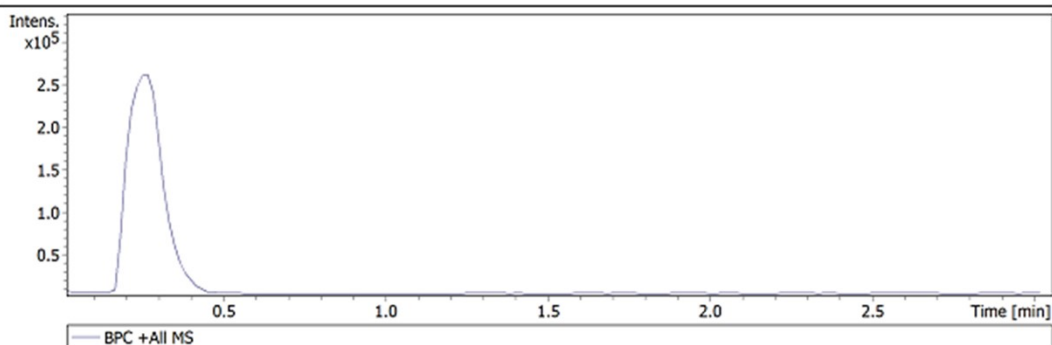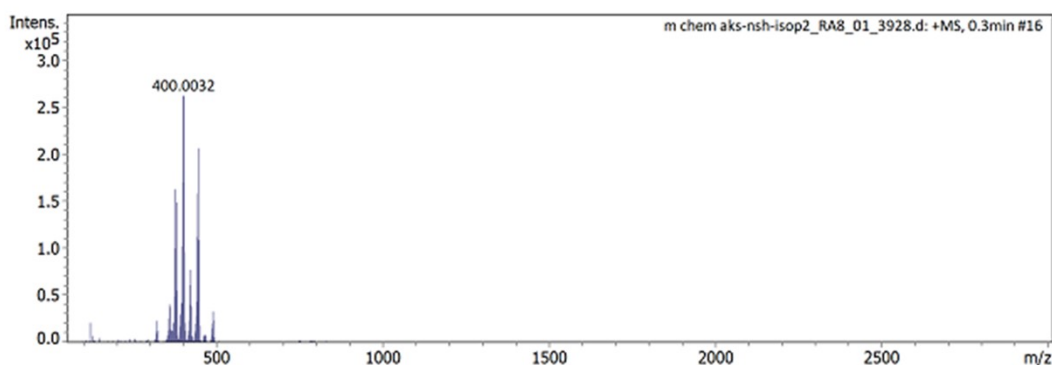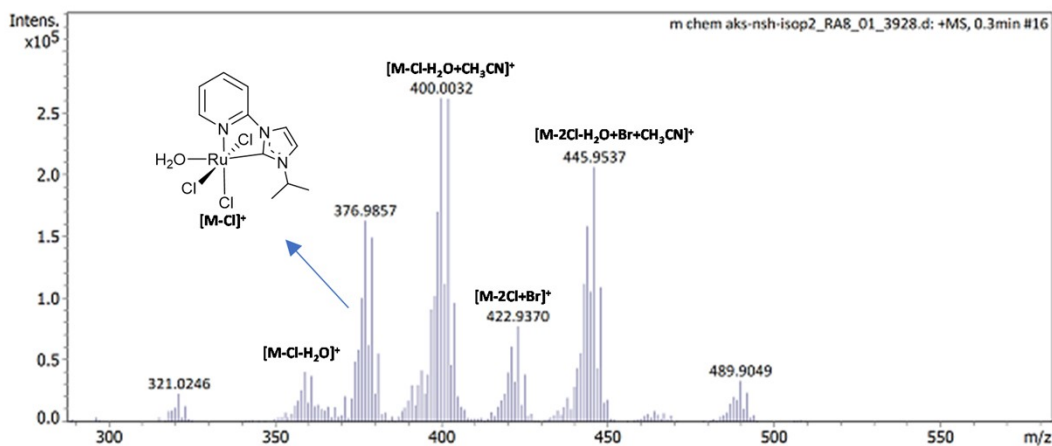

**Figure S14.** LCMS of complex **1b** synthesized from  $L^2 \cdot HBr$  showing the fragments corresponding to  $[M-Cl]^+$  and  $[M-2Cl+Br]^+$  present in the crude sample.

## Generic Display Report

### Analysis Info

|               |                                                                                 |                  |                     |
|---------------|---------------------------------------------------------------------------------|------------------|---------------------|
| Analysis Name | C:\Users\user\Downloads\OneDrive_1_2-10-2023\m chem aks-nsh-1b-e_RB6_01_22886.d | Acquisition Date | 10-02-2023 12:38:33 |
| Method        | 2. LCMS tune wide ACN.m                                                         | Operator         | IIT Indore          |
| Sample Name   | m chem aks-nsh-1b-e                                                             | Instrument       | micrOTOF-Q          |
| Comment       |                                                                                 |                  |                     |

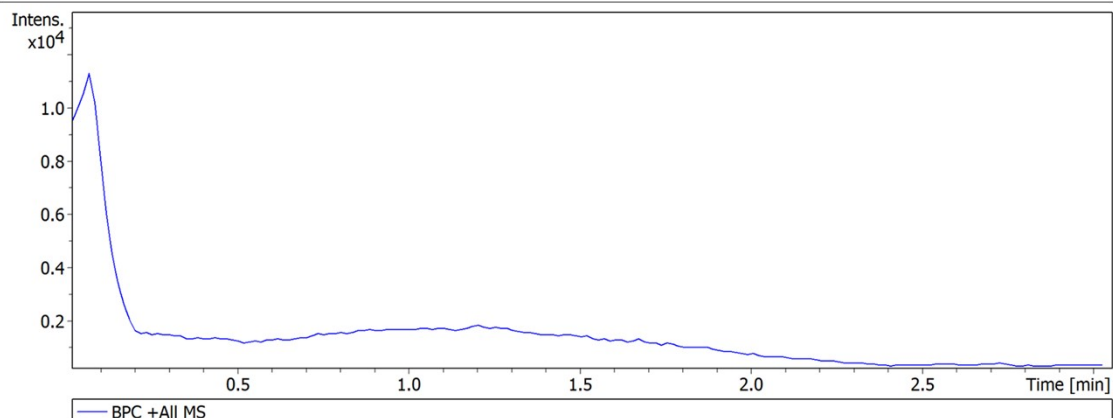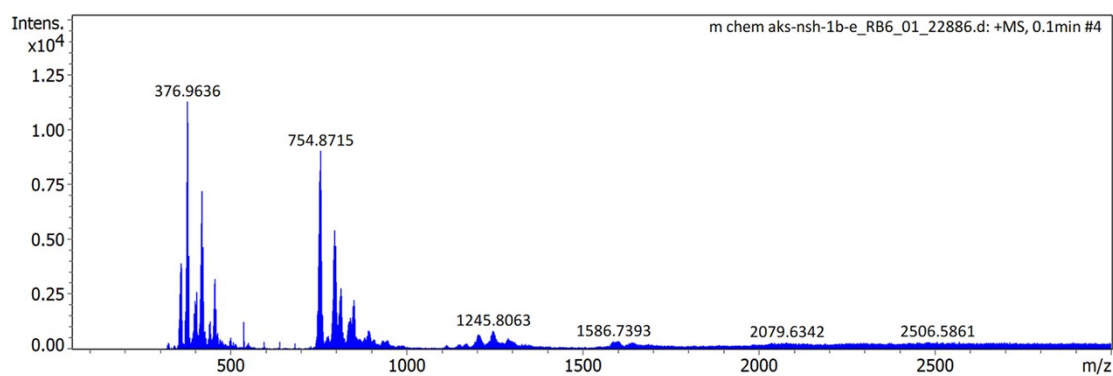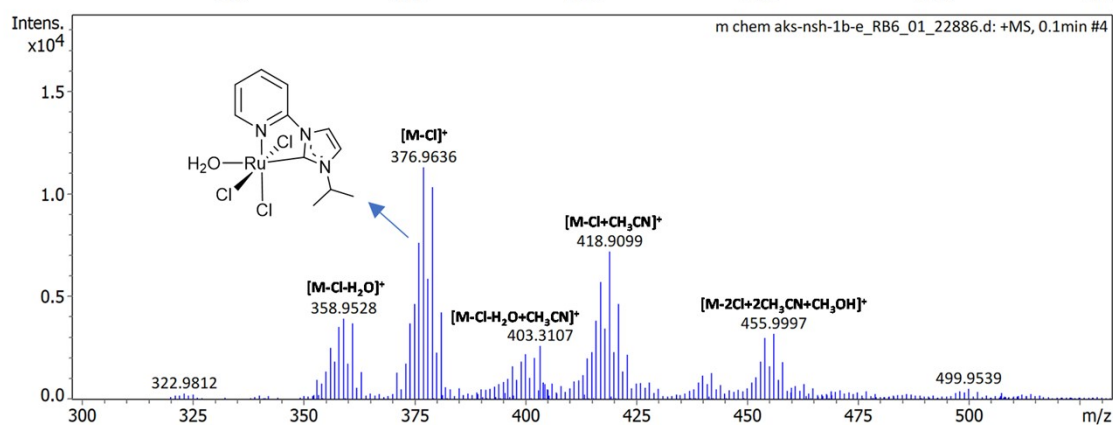

**Figure S15.** LCMS of complex **1b** synthesized from  $L^2 \cdot HI$  showing the fragments corresponding to  $[M-Cl]^+$  and  $[M-2Cl+CH_3CN]^+$  present in the crude sample.

## Generic Display Report

|                      |                                                                                 |                                      |
|----------------------|---------------------------------------------------------------------------------|--------------------------------------|
| <b>Analysis Info</b> | C:\Users\user\Downloads\OneDrive_1_2-10-2023\m chem aks-nsh-1b-e_RB6_01_22886.d | Acquisition Date 10-02-2023 12:38:33 |
| Method               | 2. LCMS tune wide ACN.m                                                         | Operator IIT Indore                  |
| Sample Name          | m chem aks-nsh-1b-e                                                             | Instrument micrOTOF-Q                |
| Comment              |                                                                                 |                                      |

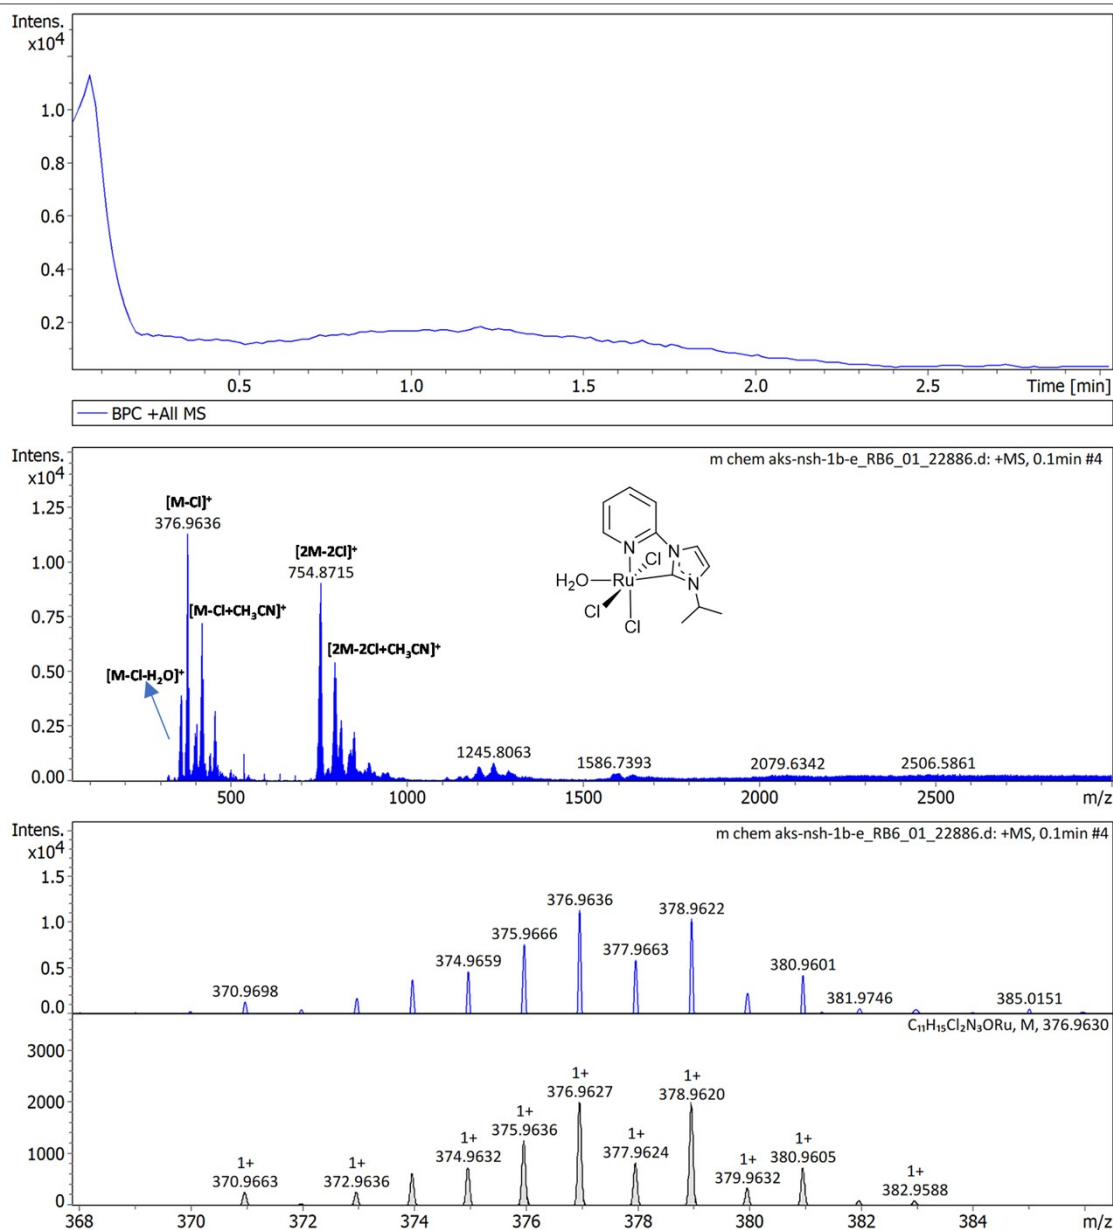

**Figure S16.** LCMS and HRMS of complex **1b** synthesized from L<sup>2</sup>·HI in absence of base.

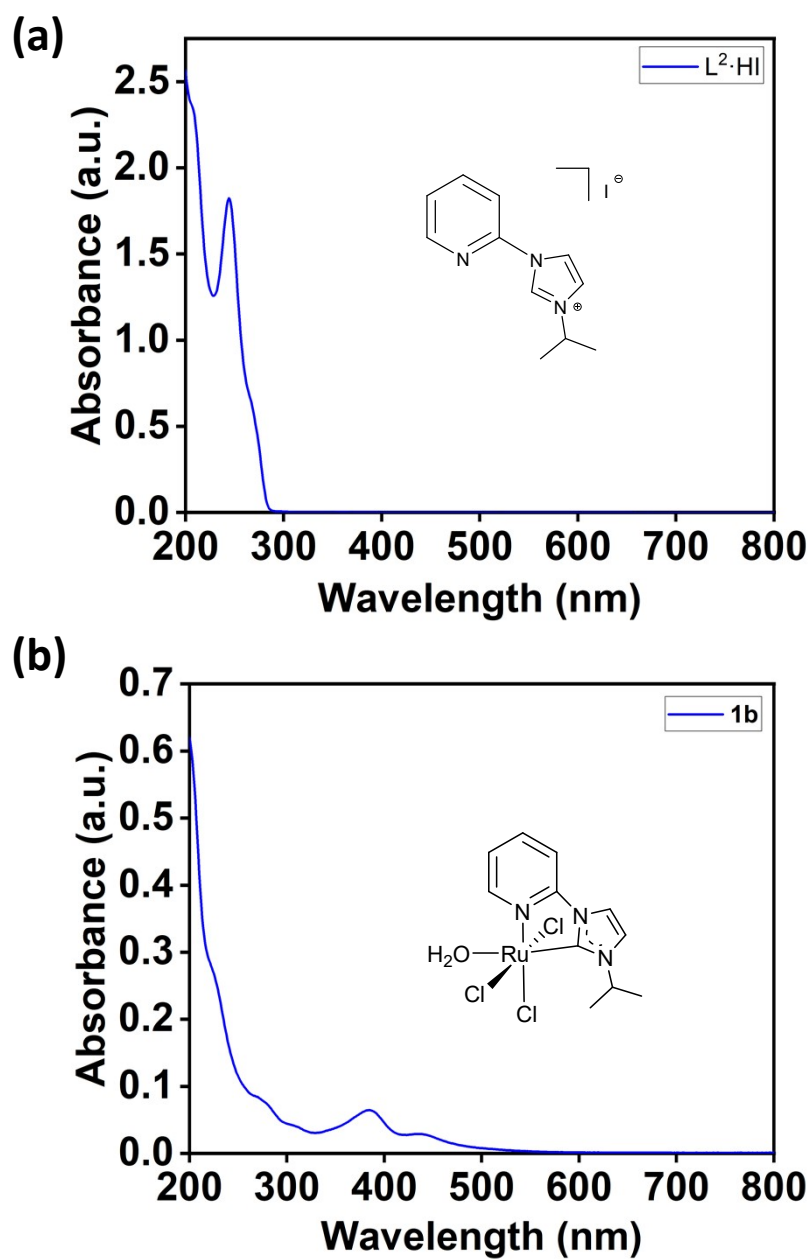

**Figure S17.** UV-vis spectra of (a) free ligand  $L^2 \cdot HI$  and (b) its respective complex **1b** recorded in MeCN at room temperature.

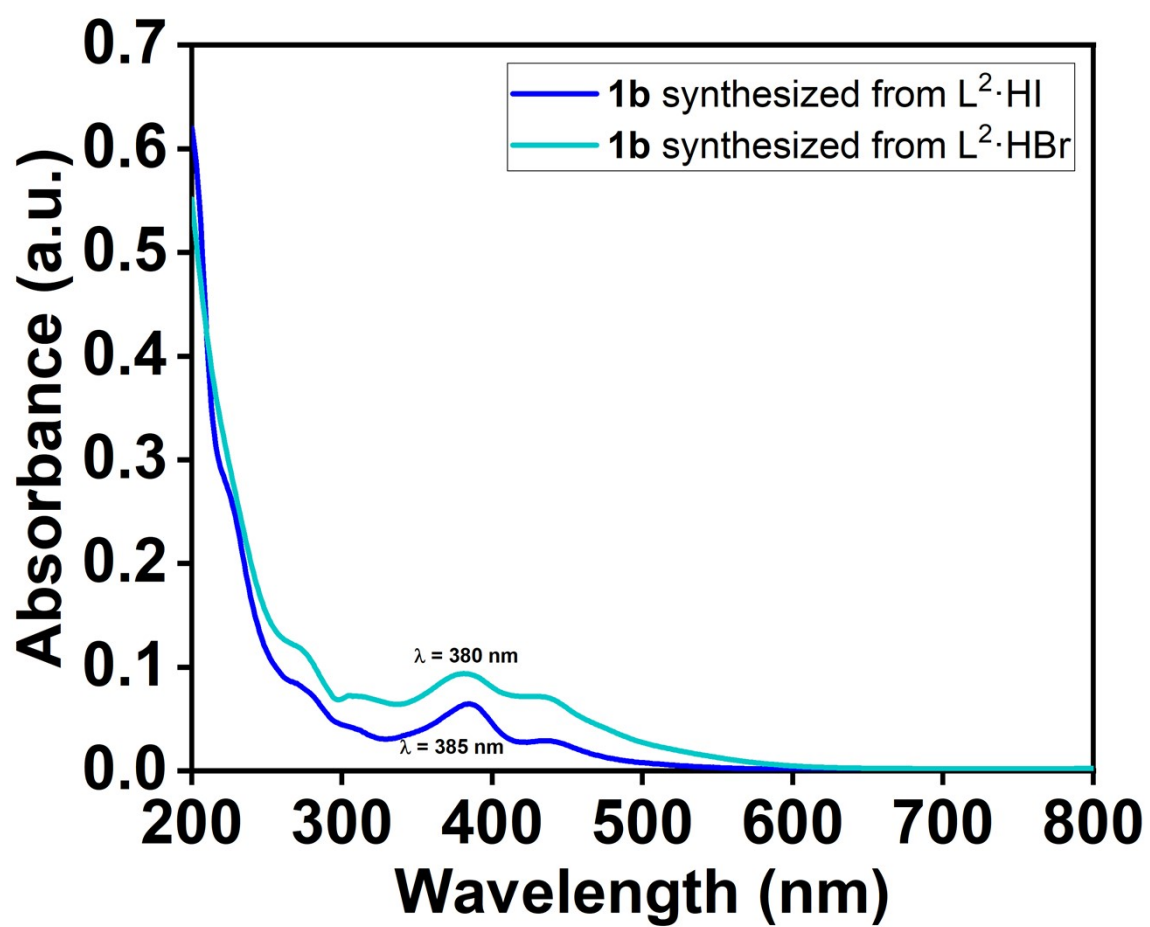

Figure S18. UV-Vis spectra of complex **1b**, synthesized from  $L^2 \cdot HI$  and  $L^2 \cdot HBr$  respectively, recorded in MeCN at room temperature

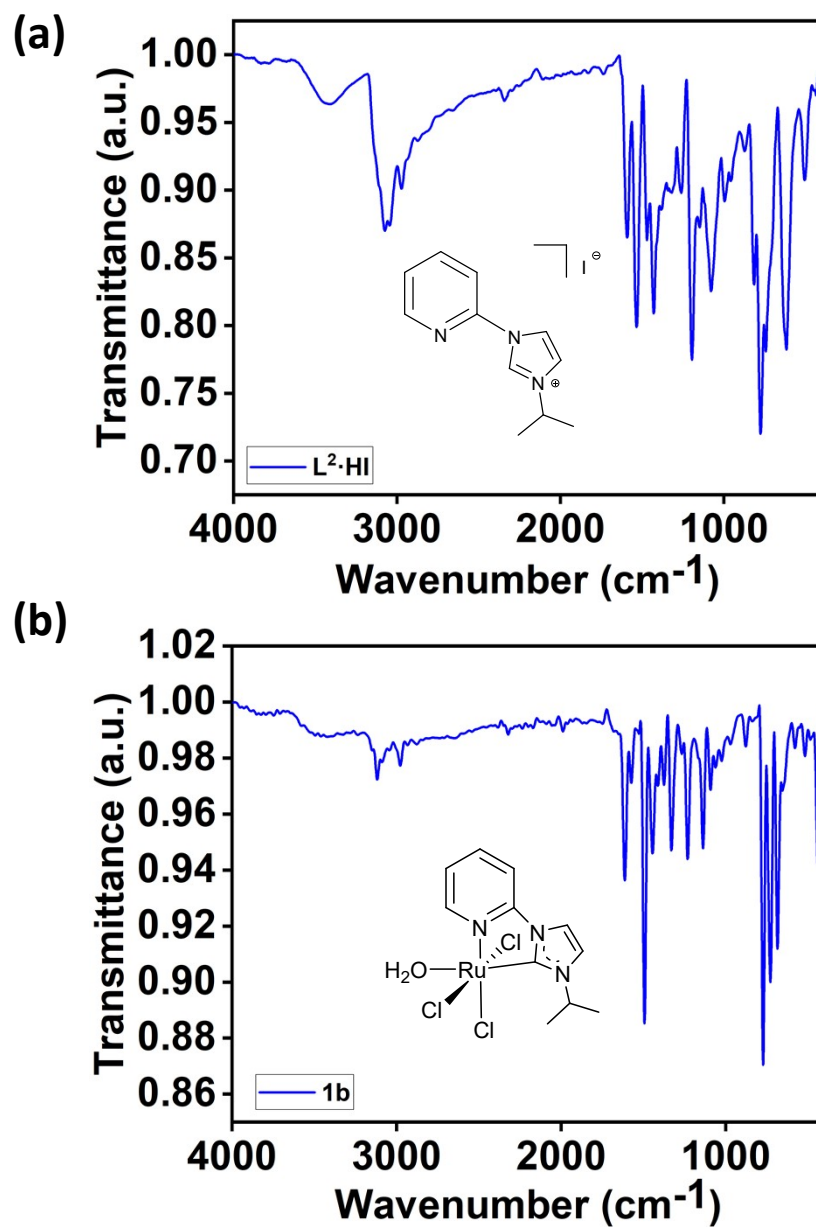

**Figure S19.** IR spectra of (a)  $L^2 \cdot HI$  and (b) its respective complex **1b** in solid state.



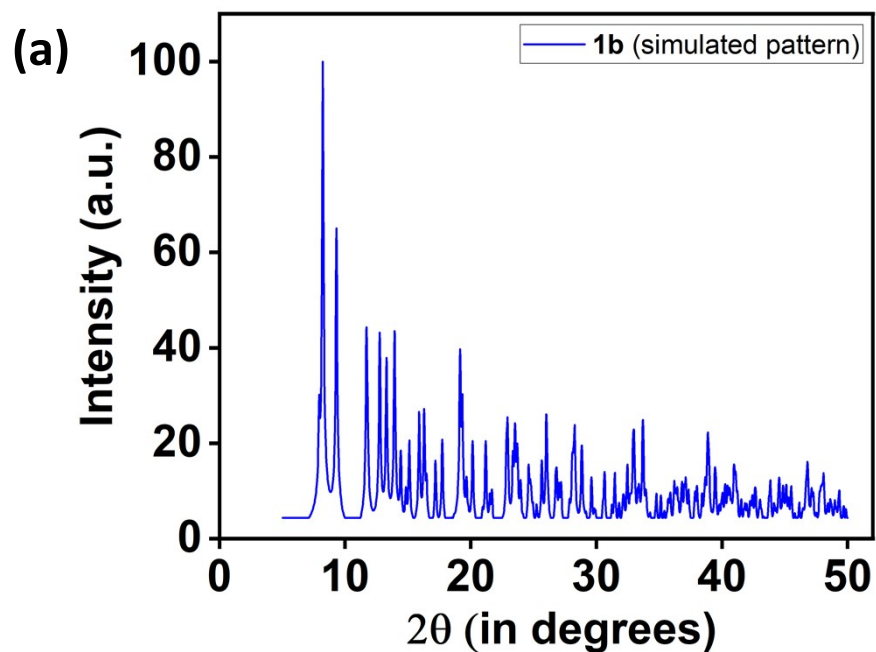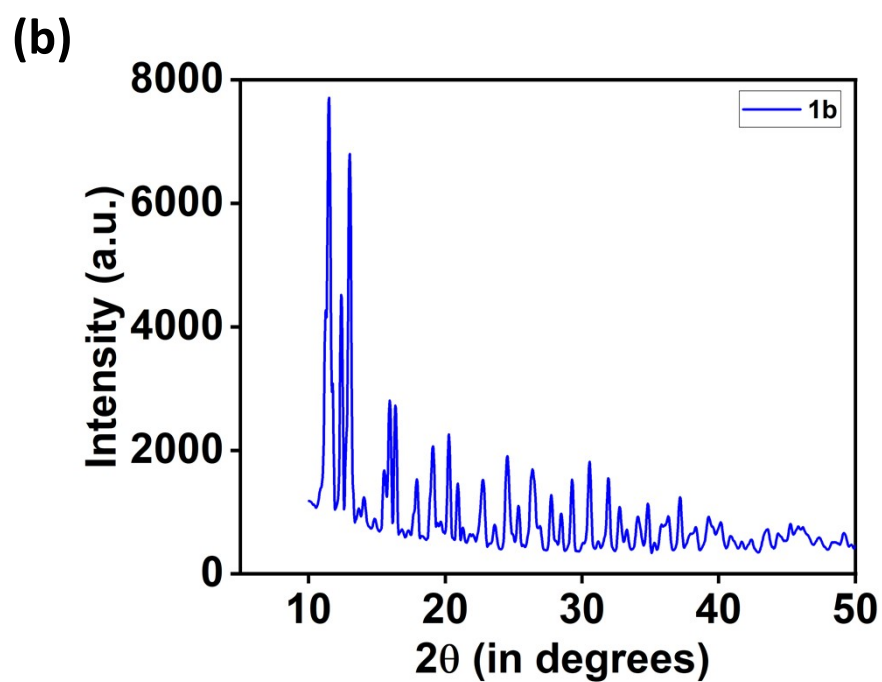

**Figure S20.** Plots of powder XRD (a) simulated pattern obtained from molecular structure **1b**-MeOH (b) pattern observed experimentally for complex **1b**. Change in position and intensity of signals from the simulated pattern arise due to the existence of solvent molecule (methanol) in the unit cell.

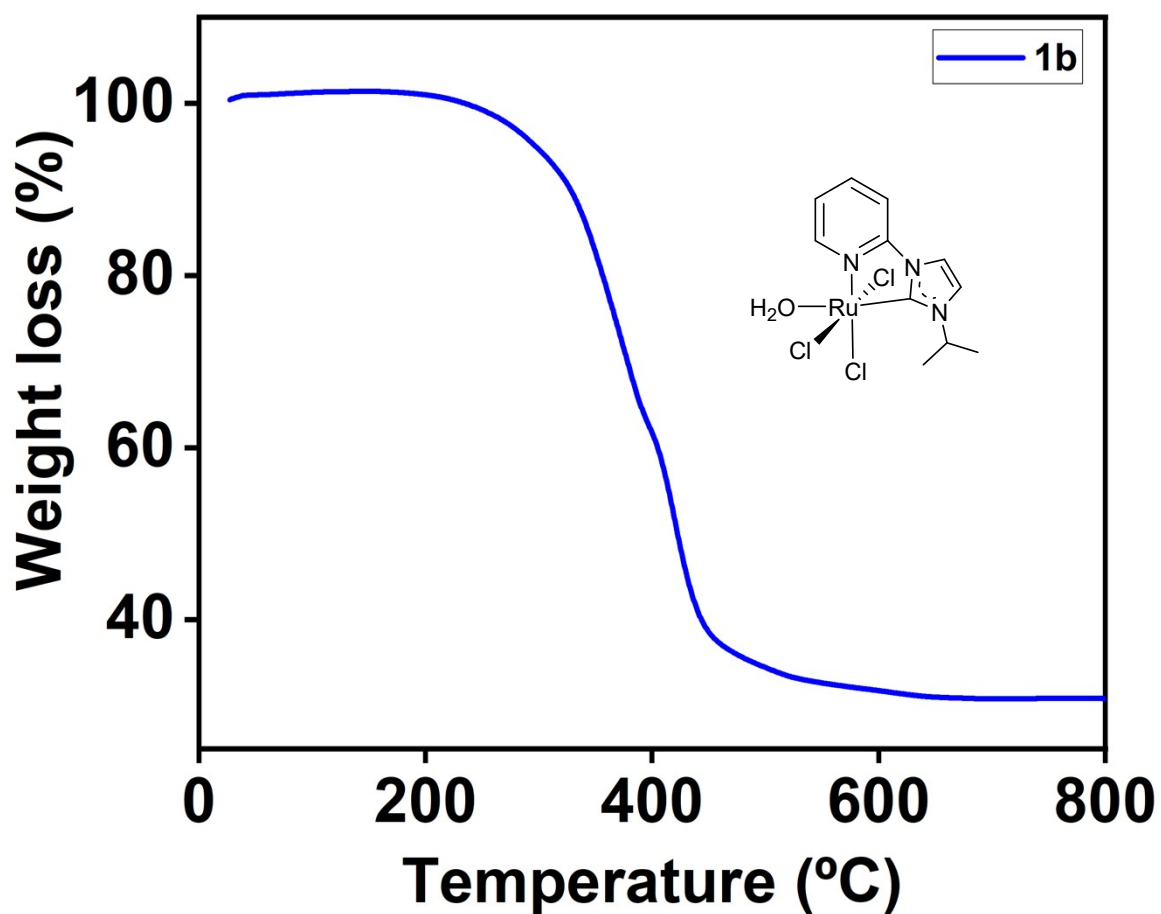

**Figure S21.** Plot of TGA for complex **1b**. The first derivative curve w.r.t. temperature has revealed that no weight loss was observed up to 230 °C. Whereas the sequential loss of H<sub>2</sub>O molecule and three chlorides was found to occur between 200–420 °C. Total weight loss was observed to be 69.9% and 31.02% of the compound was remained as residues after complete analysis.

## Generic Display Report

| Analysis Info |                                                       | Acquisition Date | 27-04-2022 16:43:25 |
|---------------|-------------------------------------------------------|------------------|---------------------|
| Analysis Name | F:\PROJECT 3\MASS\m chem AKS-NSH-1B-PP_RB2_01_16896.d | Operator         | IIT Indore          |
| Method        | 2. LCMS tune wide ACN.m                               | Instrument       | micrOTOF-Q          |
| Sample Name   | m chem AKS-NSH-1B-PP                                  |                  |                     |
| Comment       |                                                       |                  |                     |

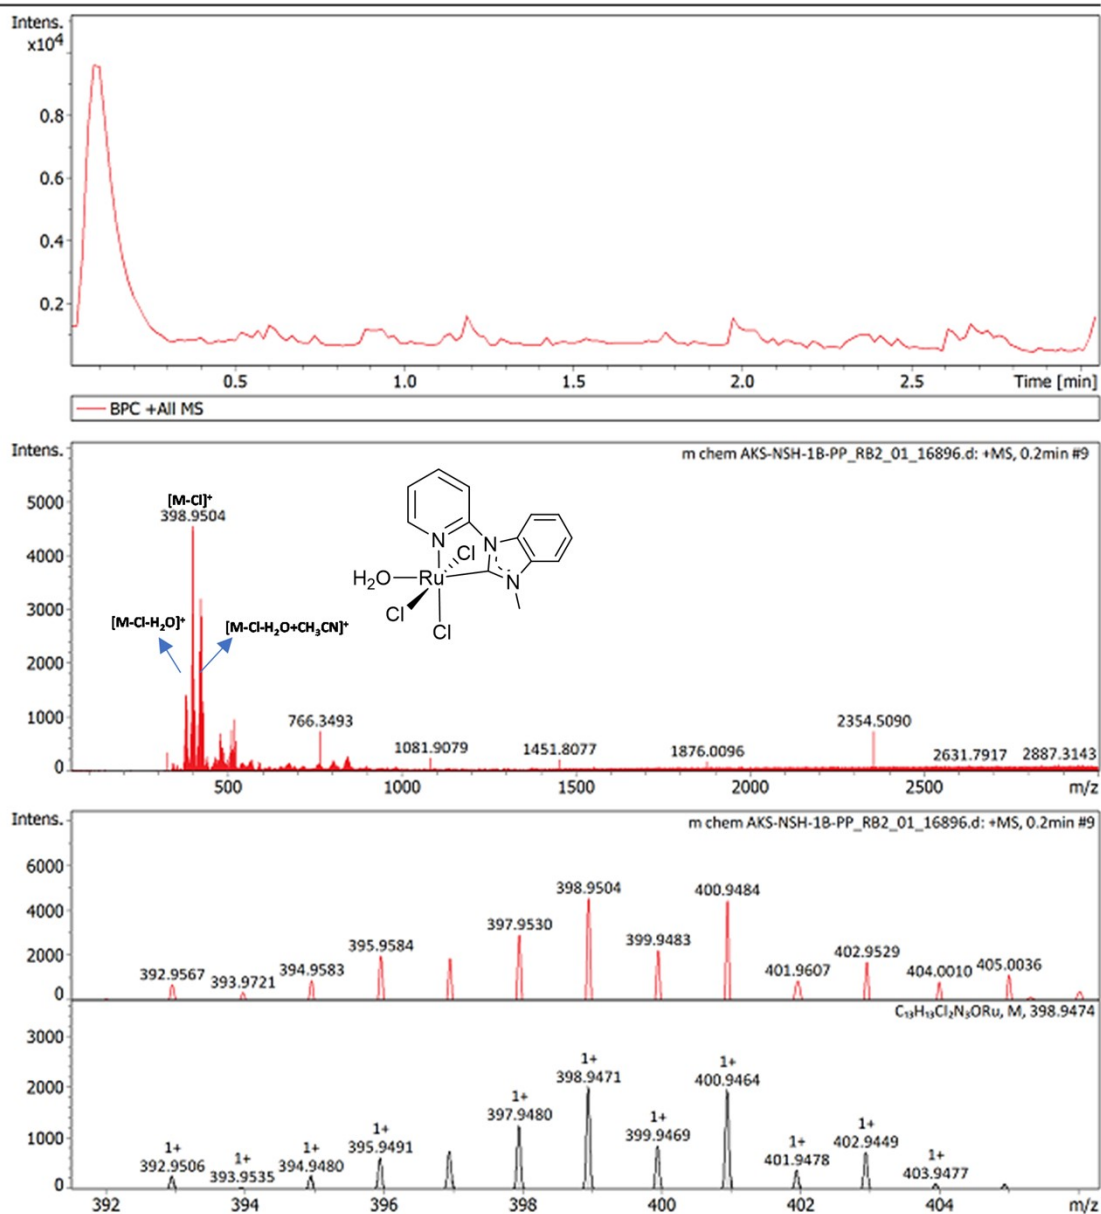

**Figure S22.** LCMS and HRMS of complex **1c** obtained in absence of base.

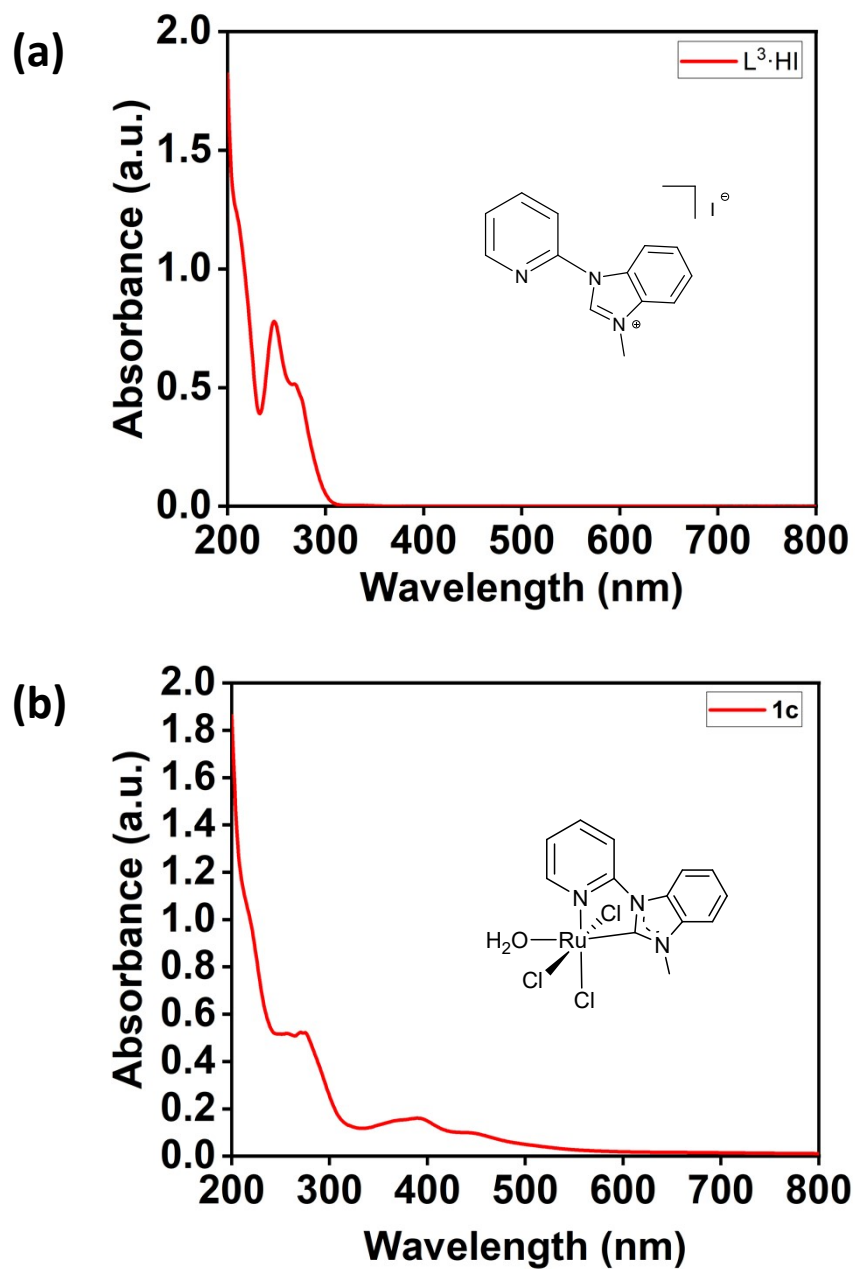

**Figure S23.** UV-Vis spectra of (a) free ligand  $L^3 \cdot HI$  and (b) its respective complex **1c** recorded in MeCN at room temperature.

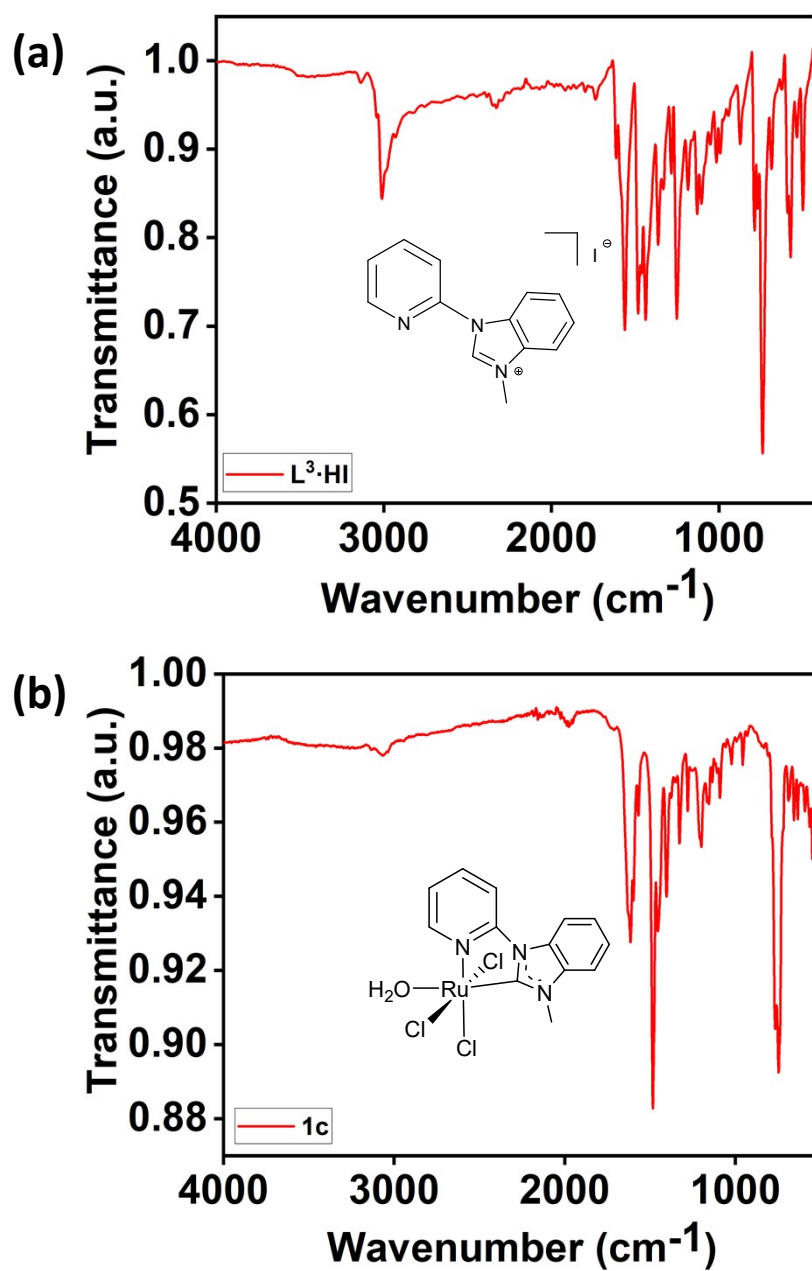

Figure S24. IR spectra of (a)  $L^3 \cdot HI$  and (b) its respective complex  $1c$  in solid state.

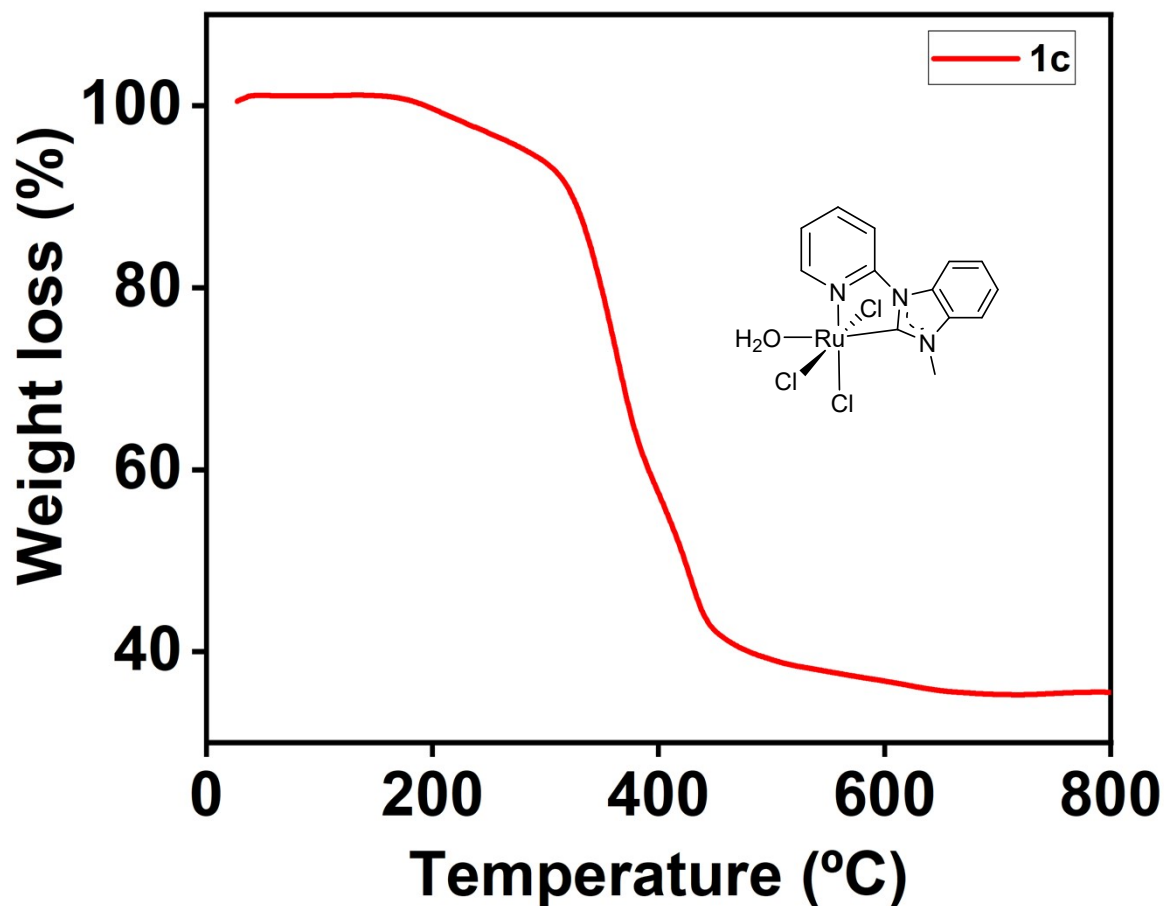

**Figure S25.** Plot of TGA for complex **1c**. The first derivative curve w.r.t. temperature has revealed that no weight loss was observed up to 150 °C. Whereas the sequential loss of H<sub>2</sub>O molecule and three chlorides was found to occur between 200–420 °C. Total weight loss was observed to be 65.42 % and 35.42% of the compound was remained as residues after complete analysis.

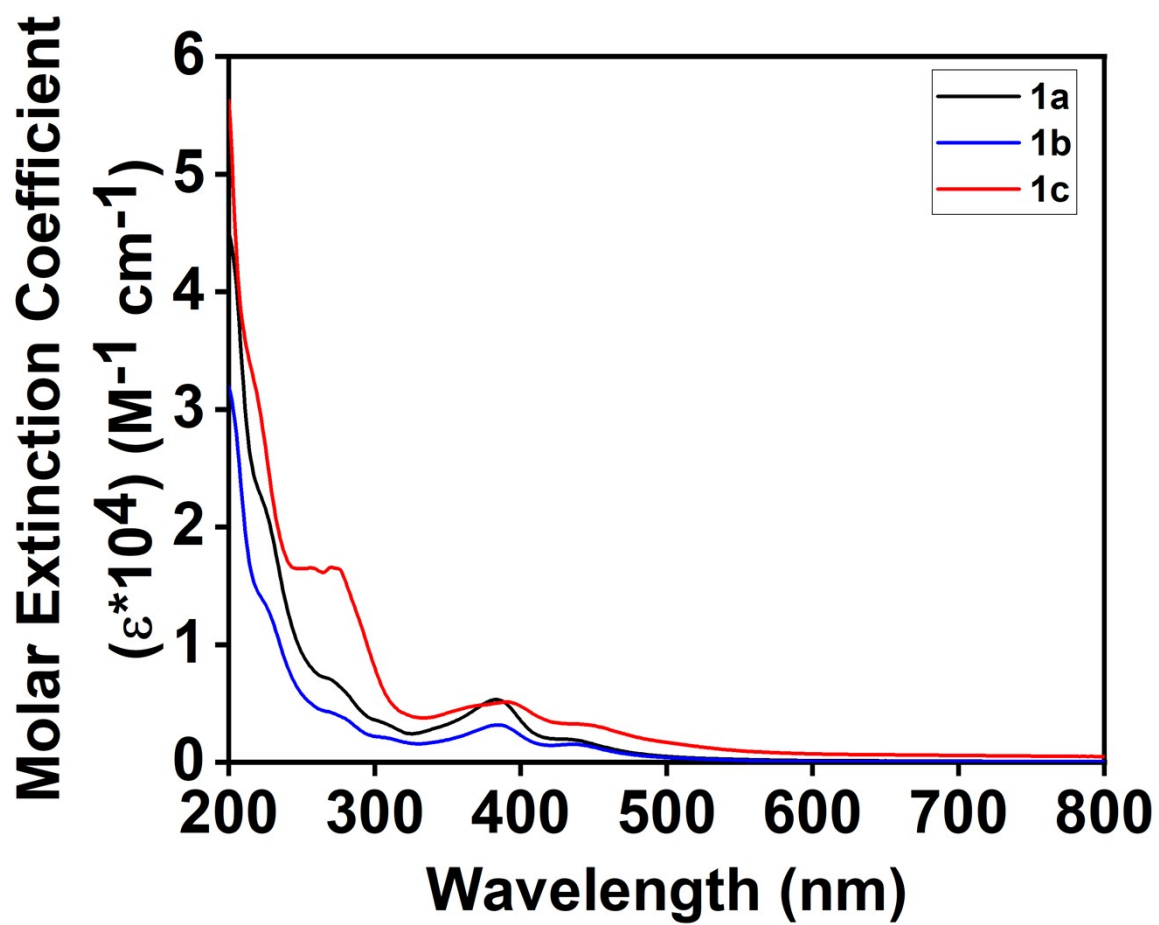

**Figure S26.** Molar extinction coefficients of complexes **1a–c** recorded in MeCN at room temperature.

## Generic Display Report

|                      |                                                      |                  |                     |
|----------------------|------------------------------------------------------|------------------|---------------------|
| <b>Analysis Info</b> |                                                      | Acquisition Date | 27-12-2021 21:17:59 |
| Analysis Name        | F:\PROJECT 3\MASS\m chem AKS-NSH-1-Cl_RA7_01_12172.d | Operator         | IIT Indore          |
| Method               | 2. LCMS tune wide ACN.m                              | Instrument       | micrOTOF-Q          |
| Sample Name          | m chem AKS-NSH-1-Cl                                  |                  |                     |
| Comment              |                                                      |                  |                     |

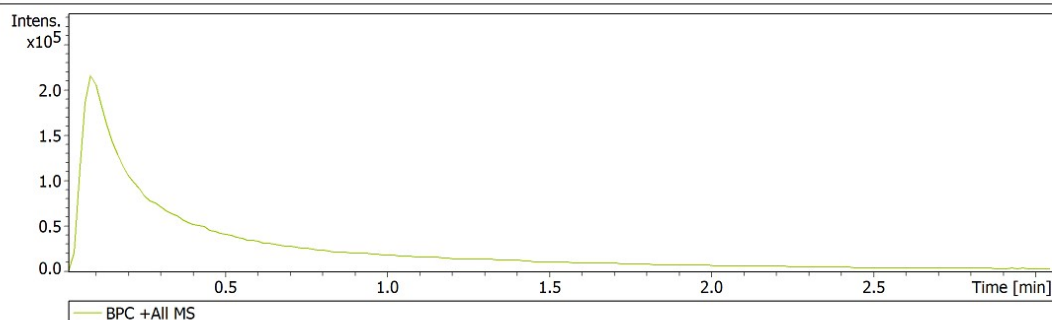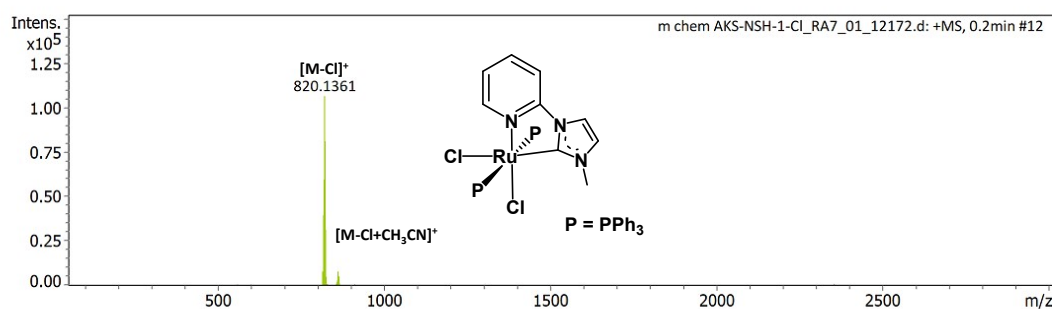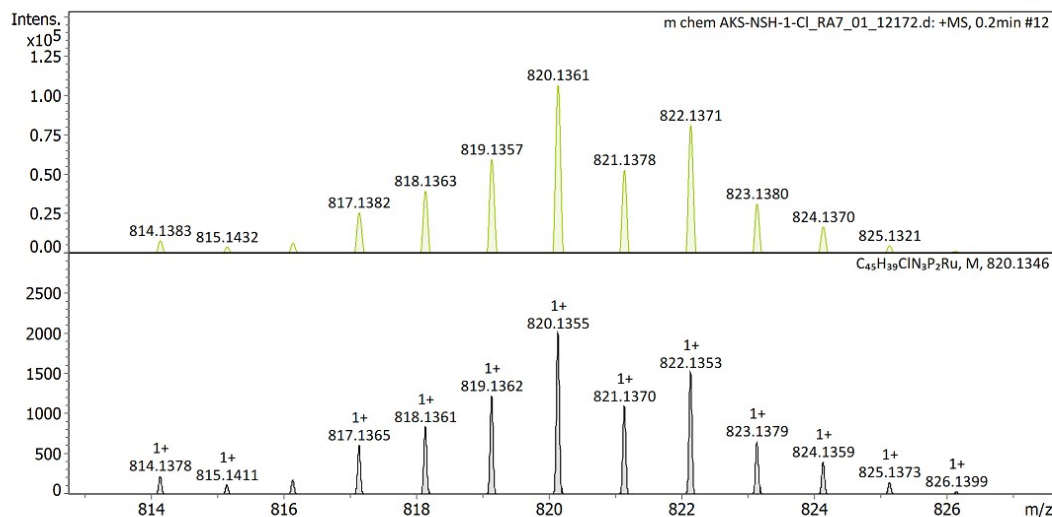

**Figure S27.** LCMS and HRMS of complex **2a**.



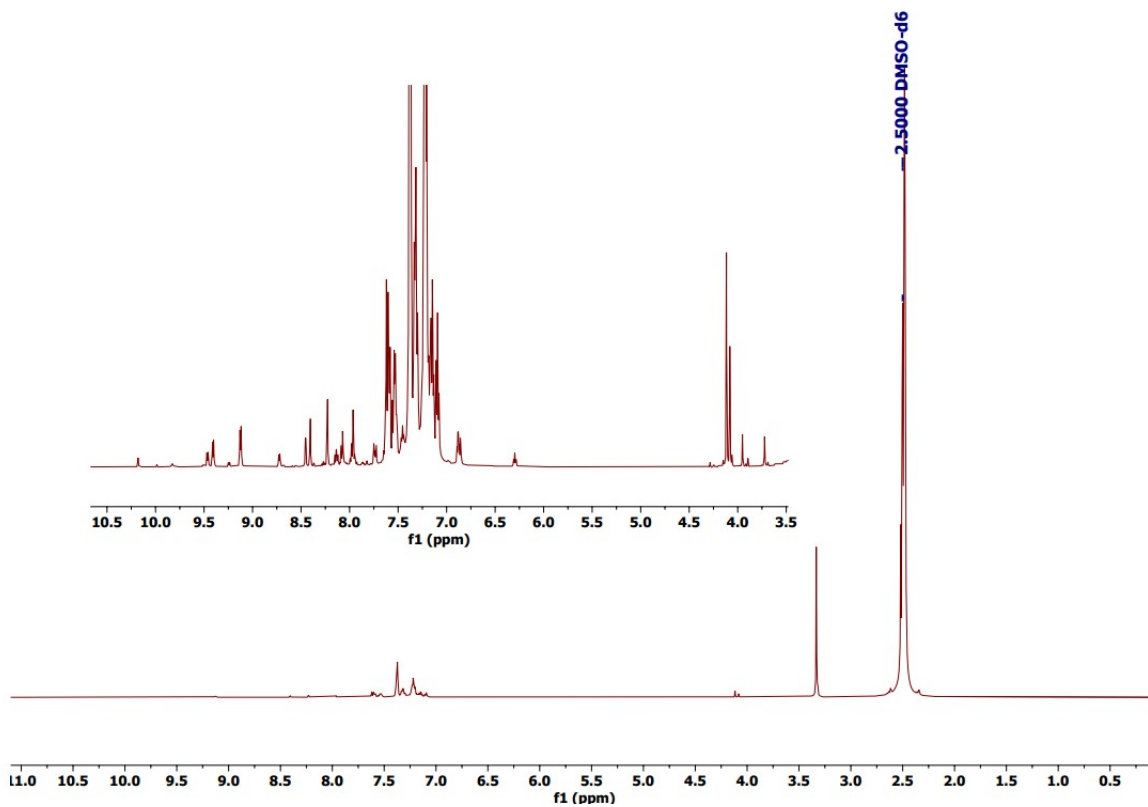

**Figure S28.**  $^1\text{H}$  NMR spectrum of **2a** in  $\text{DMSO-d}_6$ . Peak assignment is difficult due to poor solubility and existence of two species in solution.

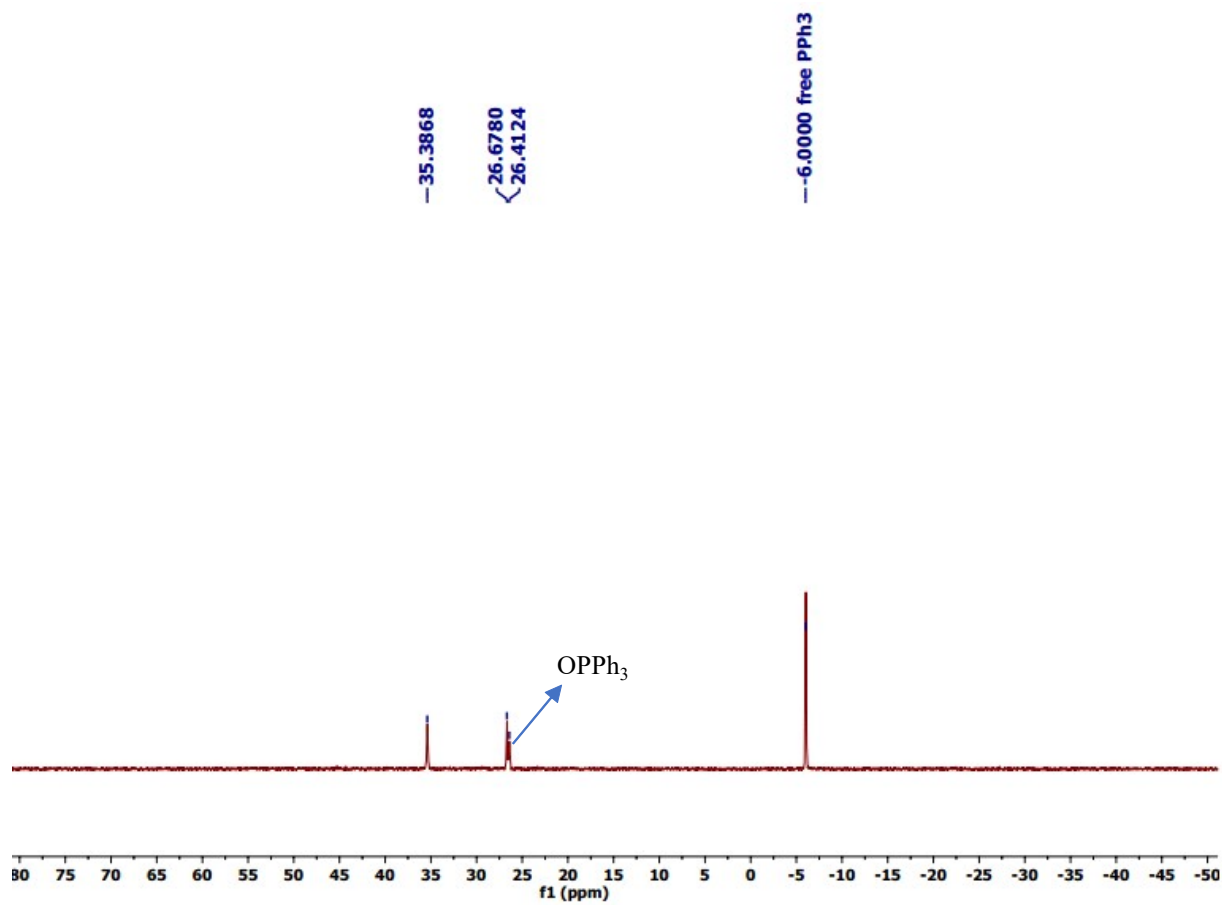

**Figure S29.**  $^{31}\text{P}$  NMR spectrum of complex **2a** in  $\text{DMSO-d}_6$ .  $\text{OPPh}_3$  was observed in the spectrum due to the arial oxidation.

## Generic Display Report

### Analysis Info

|               |                                                        |
|---------------|--------------------------------------------------------|
| Analysis Name | F:\PROJECT 3\MASS\h chem aks-nsh-387-2a_RC4_01_11461.d |
| Method        | 2. LCMS tune wide ACN.m                                |
| Sample Name   | m chem aks-nsh-387-ka-2a                               |
| Comment       |                                                        |

Acquisition Date 08-12-2021 16:54:52

Operator IIT Indore  
Instrument micrOTOF-Q

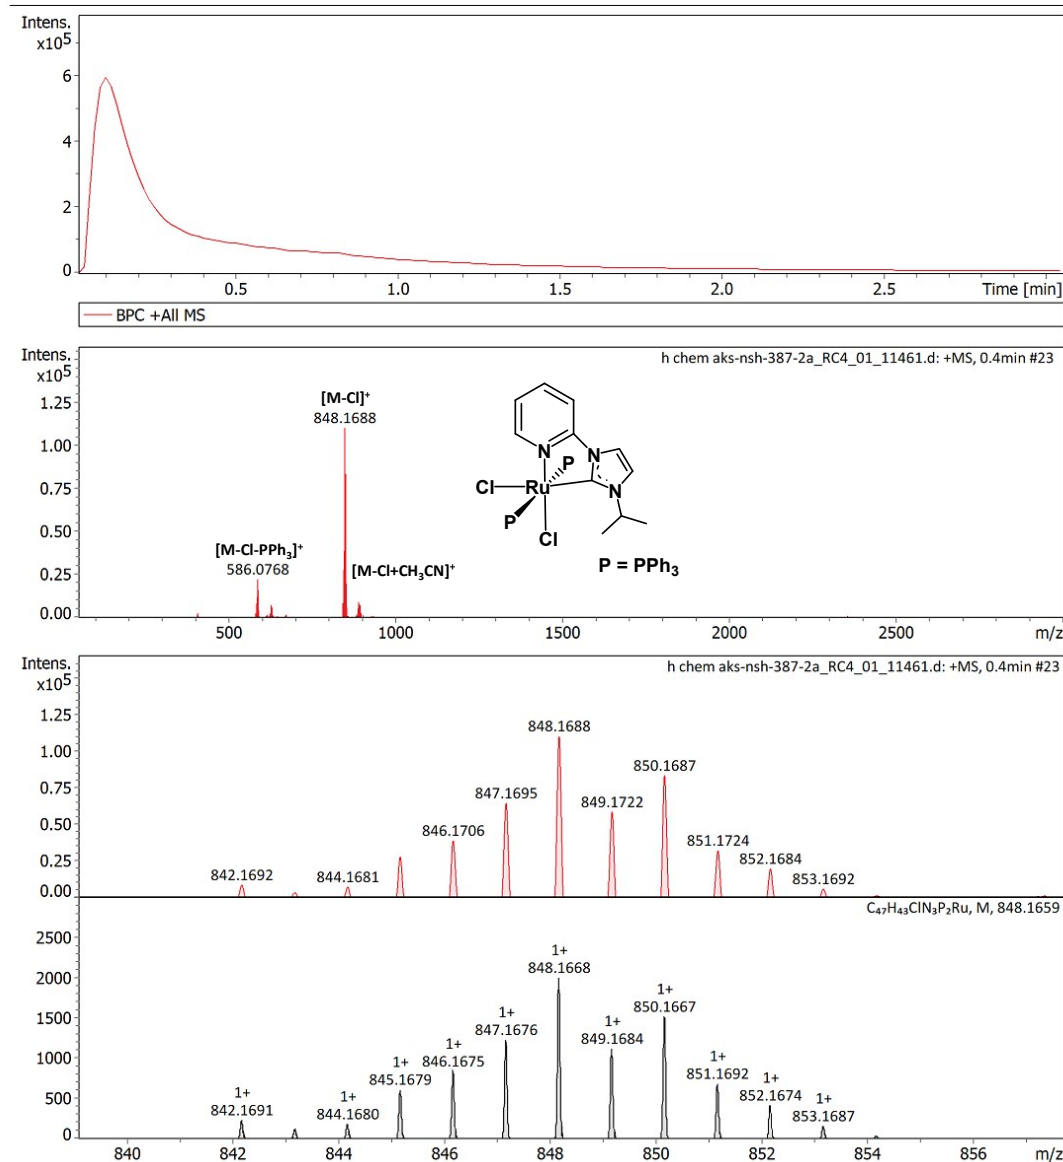

**Figure S30.** LCMS and HRMS of complex **2b**.

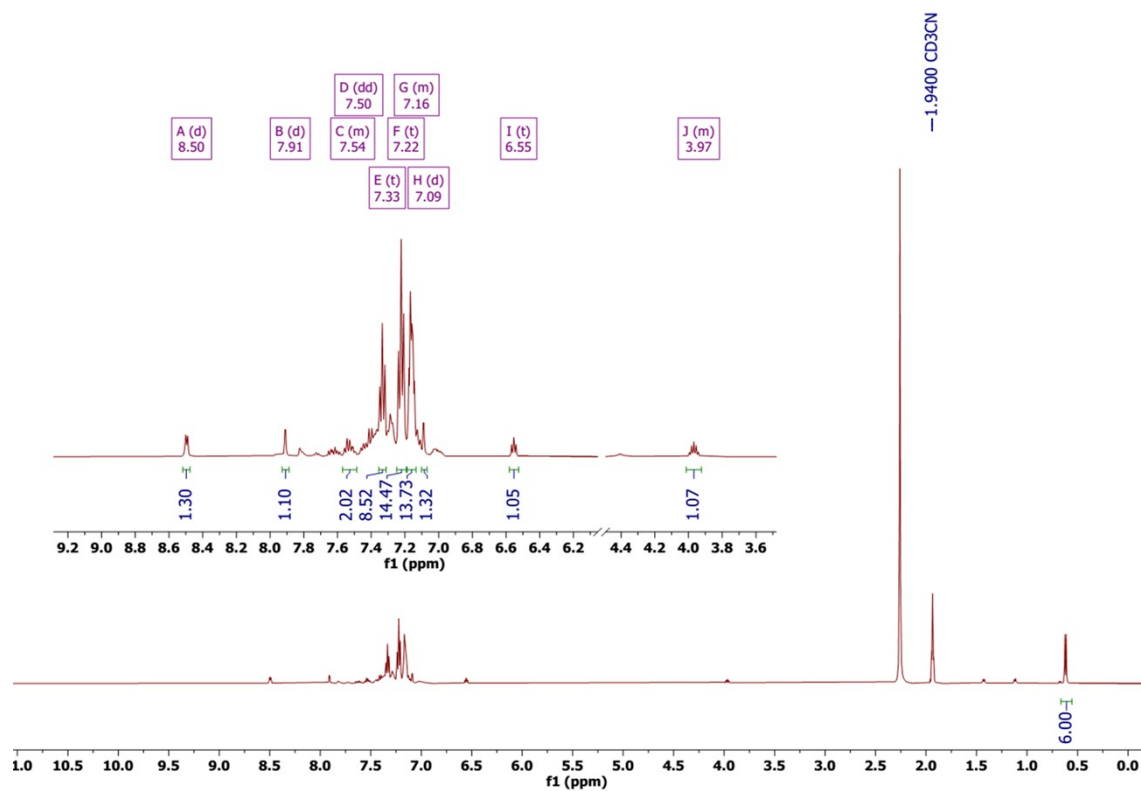

Figure S31.  $^1\text{H}$  NMR of complex **2b** in  $\text{CD}_3\text{CN}$ .

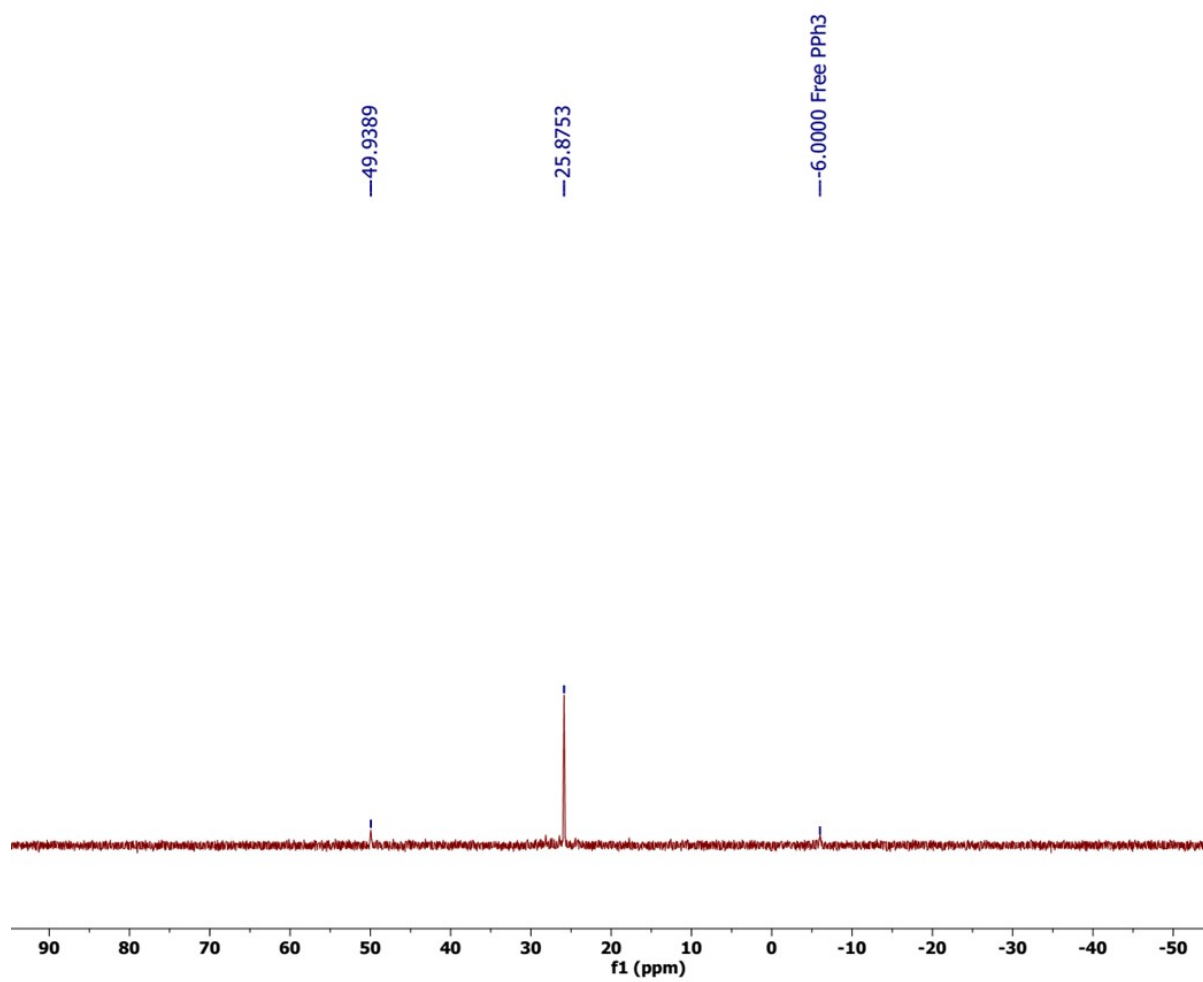

**Figure S32.**  $^{31}\text{P}$  NMR of complex **2b** in  $\text{CD}_3\text{CN}$ .

## Generic Display Report

### Analysis Info

|               |                                                       |                  |                     |
|---------------|-------------------------------------------------------|------------------|---------------------|
| Analysis Name | F:\PROJECT 3\MASS\m chem aks-nsh-390-2_RC1_01_11458.d | Acquisition Date | 08-12-2021 16:31:21 |
| Method        | 2. LCMS tune wide ACN.m                               | Operator         | IIT Indore          |
| Sample Name   | m chem aks-nsh-390-2                                  | Instrument       | micrOTOF-Q          |
| Comment       |                                                       |                  |                     |

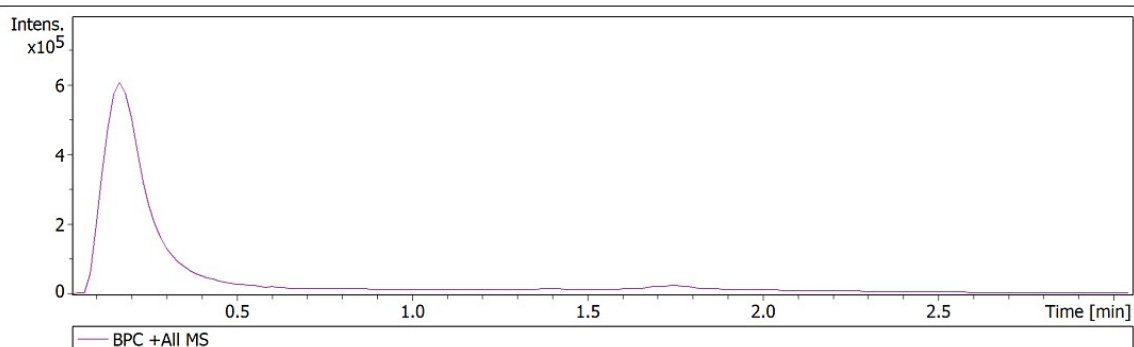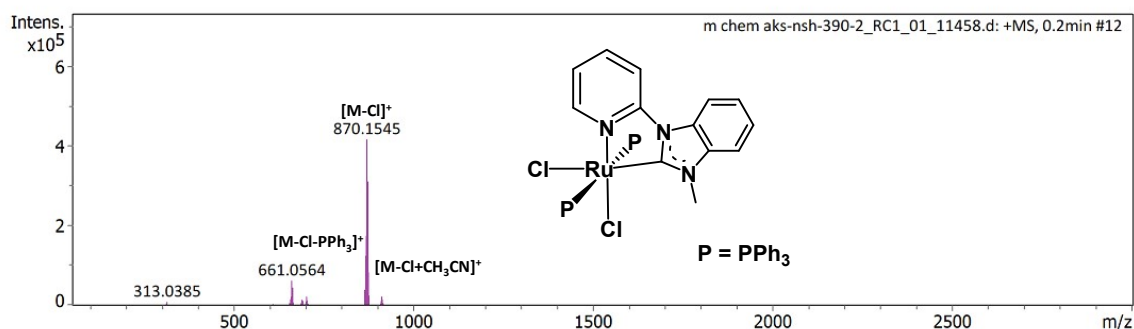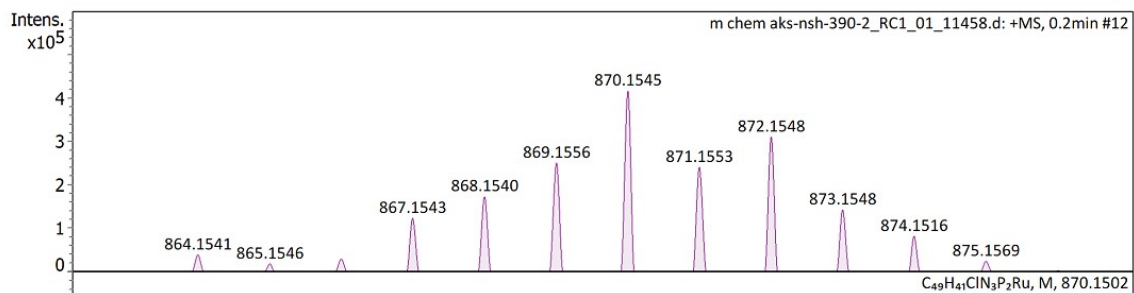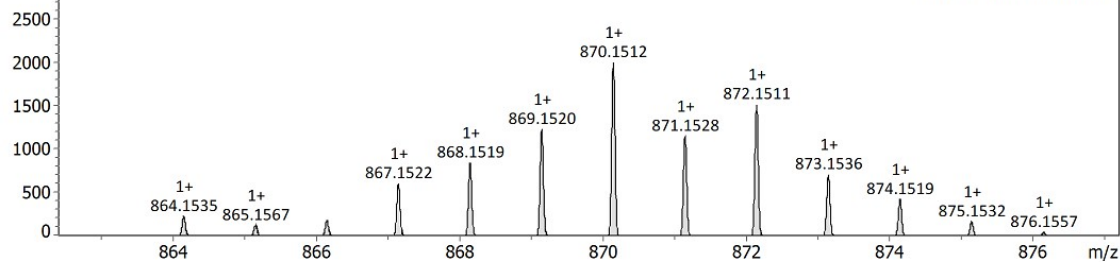

Figure S33. LCMS and HRMS of complex **2c**.

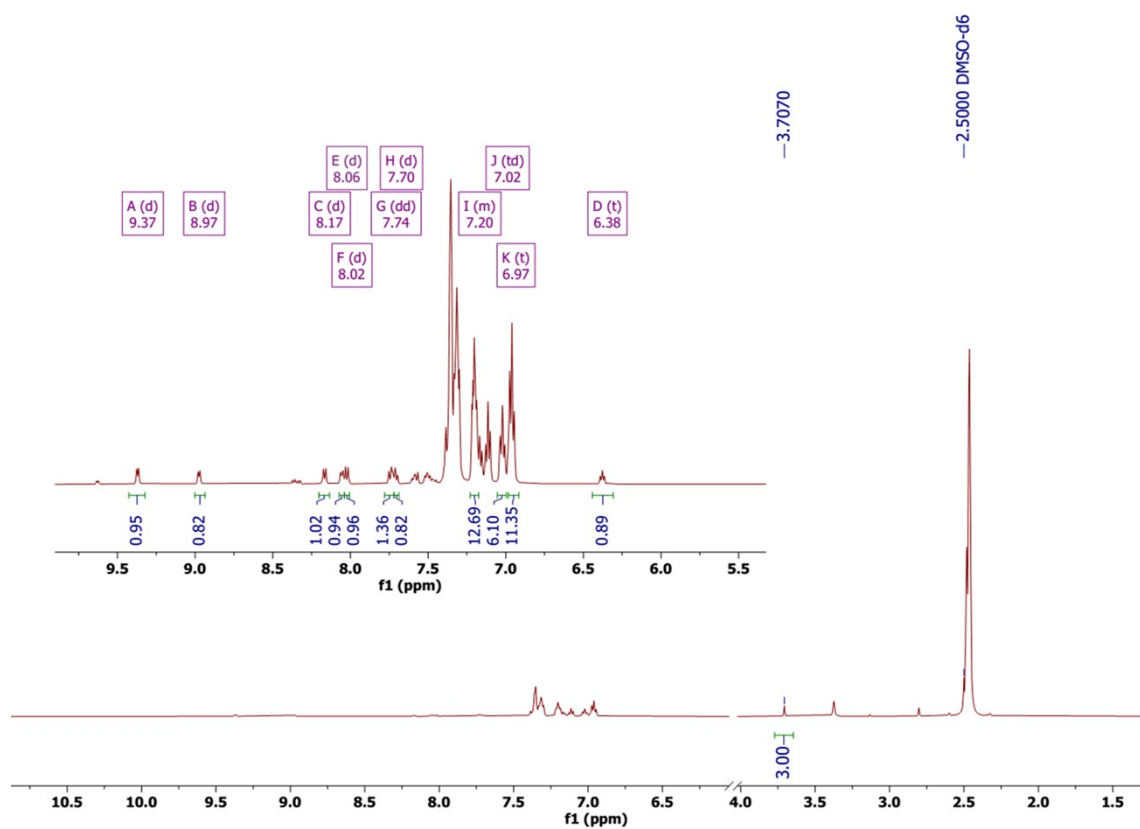

**Figure S34.**  $^1\text{H}$  NMR of complex **2c** in  $\text{DMSO-d}_6$ .

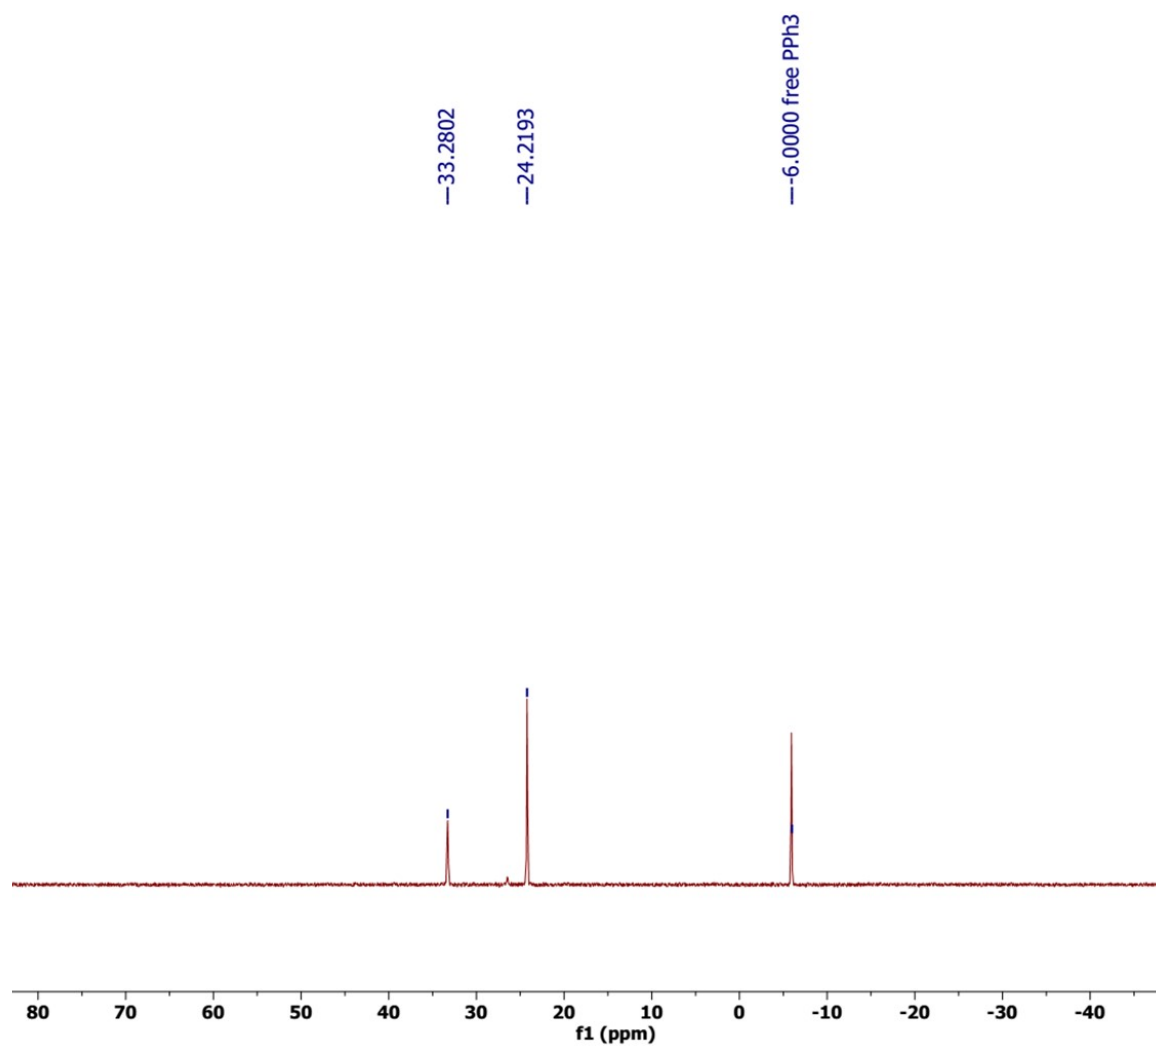

**Figure S35.**  $^{31}\text{P}$  NMR of complex **2c** in  $\text{DMSO-d}_6$ .



## Display Report

### Analysis Info

Analysis Name D:\Data\April 2022\h chem AKS-RKS-56\_RD1\_01\_16735.d  
Method 2. LCMS tune wide ACN.m  
Sample Name h chem AKS-RKS-56  
Comment

Acquisition Date 22-Apr-22 2:55:46 PM

Operator IIT Indore  
Instrument micrOTOF-Q 228888.10348

### Acquisition Parameter

|             |            |                       |           |                  |           |
|-------------|------------|-----------------------|-----------|------------------|-----------|
| Source Type | ESI        | Ion Polarity          | Positive  | Set Nebulizer    | 2.0 Bar   |
| Focus       | Not active | Set Capillary         | 4500 V    | Set Dry Heater   | 250 °C    |
| Scan Begin  | 50 m/z     | Set End Plate Offset  | -500 V    | Set Dry Gas      | 7.0 l/min |
| Scan End    | 3000 m/z   | Set Collision Cell RF | 650.0 Vpp | Set Divert Valve | Waste     |

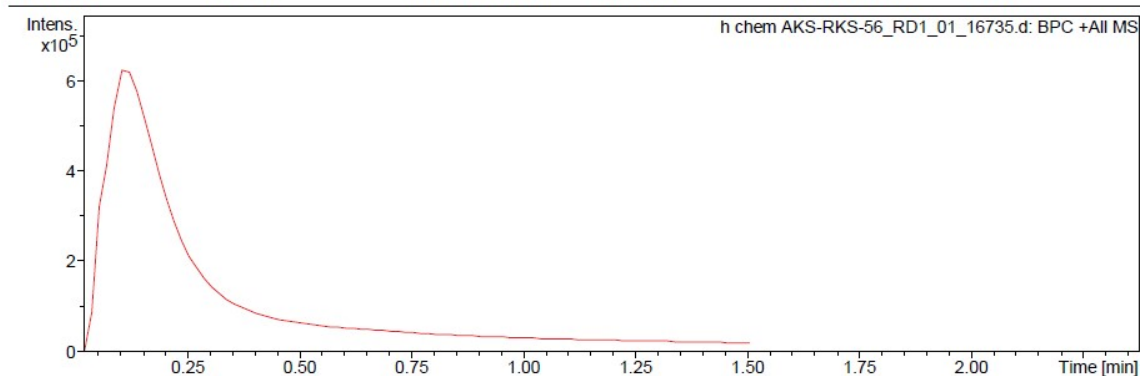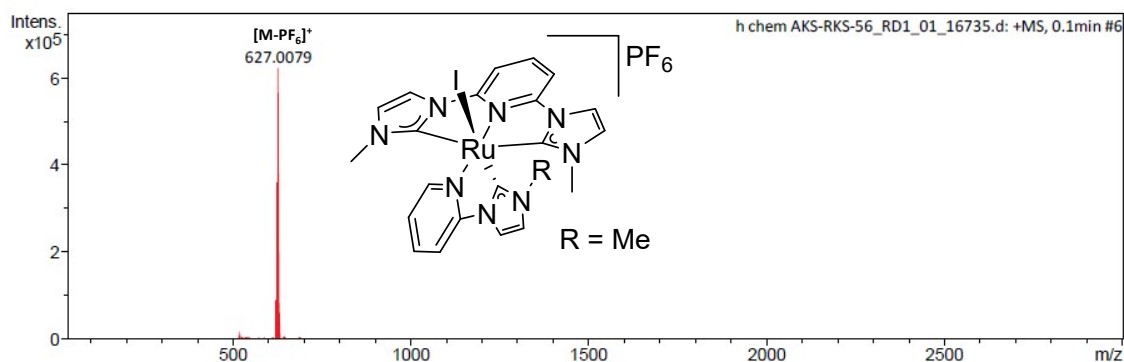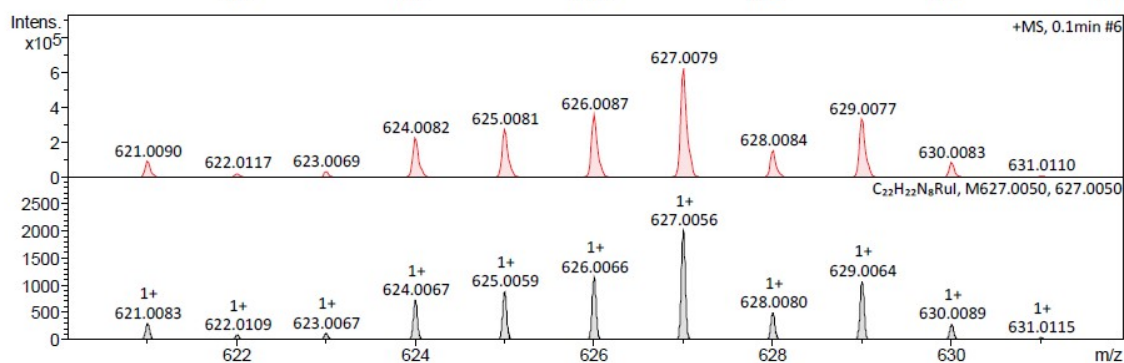

0

Figure S36. LCMS and HRMS of complex **3a**.

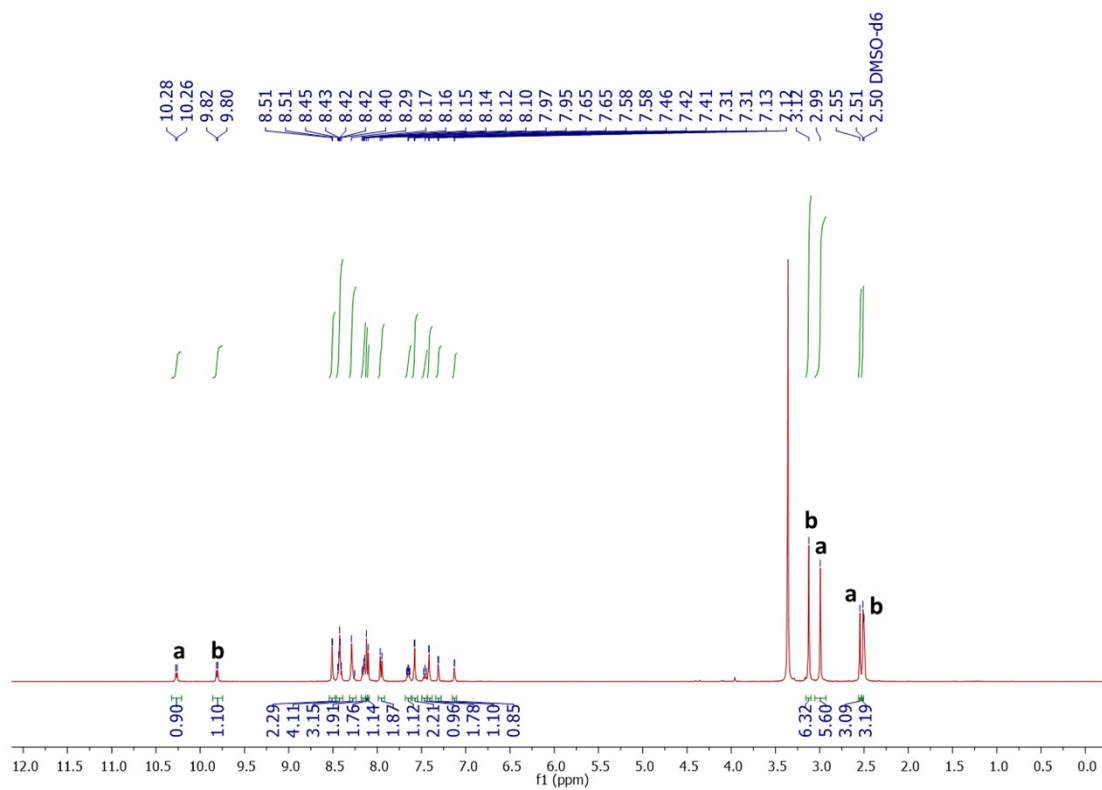

**Figure S37.**  $^1\text{H}$  NMR of complex **3a** in  $\text{DMSO-d}_6$  showing two distinct species **a** (45%) & **b** (55%) in solution.

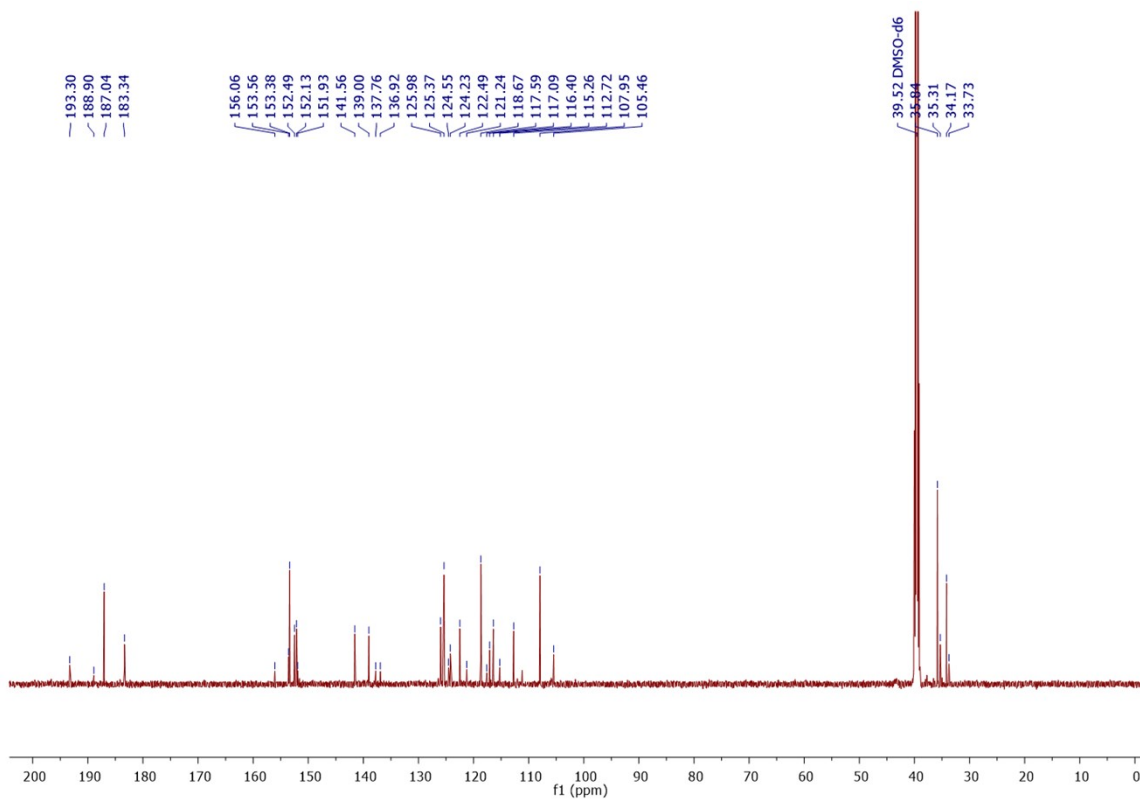

**Figure S38.**  $^{13}\text{C}$  NMR of complex **3a** in  $\text{DMSO-d}_6$  showing two distinct species **a** and **b** in solution.

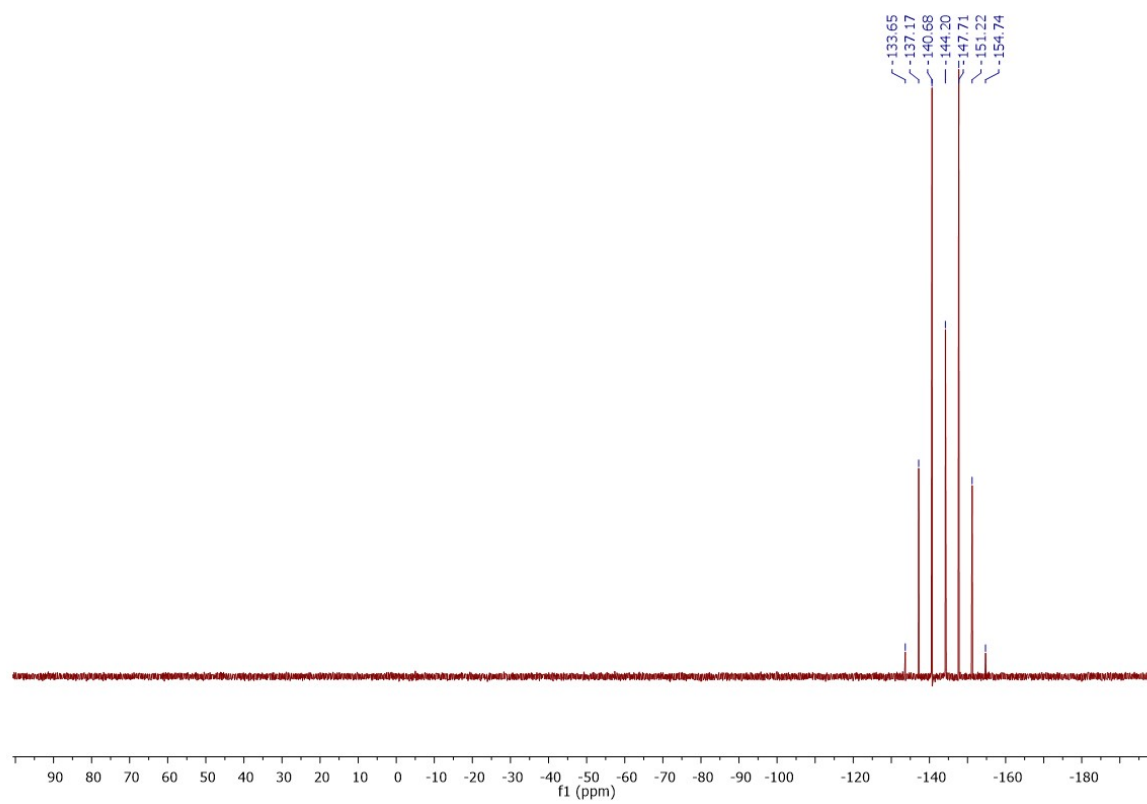

**Figure S39.**  $^{31}\text{P}$  NMR of complex **3a** in  $\text{DMSO-d}_6$ .

## Display Report

### Analysis Info

Analysis Name D:\Data\April 2021\m chem AKS-RKS-123\_RA2\_01\_5091.d  
 Method 2. LCMS tune wide ACN.m  
 Sample Name m chem AKS-RKS-123  
 Comment

Acquisition Date 03-Apr-21 4:56:04 PM

Operator IIT Indore  
 Instrument micrOTOF-Q 228888.10348

### Acquisition Parameter

|             |            |                       |           |                  |           |
|-------------|------------|-----------------------|-----------|------------------|-----------|
| Source Type | ESI        | Ion Polarity          | Positive  | Set Nebulizer    | 2.0 Bar   |
| Focus       | Not active | Set Capillary         | 4500 V    | Set Dry Heater   | 250 °C    |
| Scan Begin  | 50 m/z     | Set End Plate Offset  | -500 V    | Set Dry Gas      | 5.0 l/min |
| Scan End    | 3000 m/z   | Set Collision Cell RF | 650.0 Vpp | Set Divert Valve | Waste     |

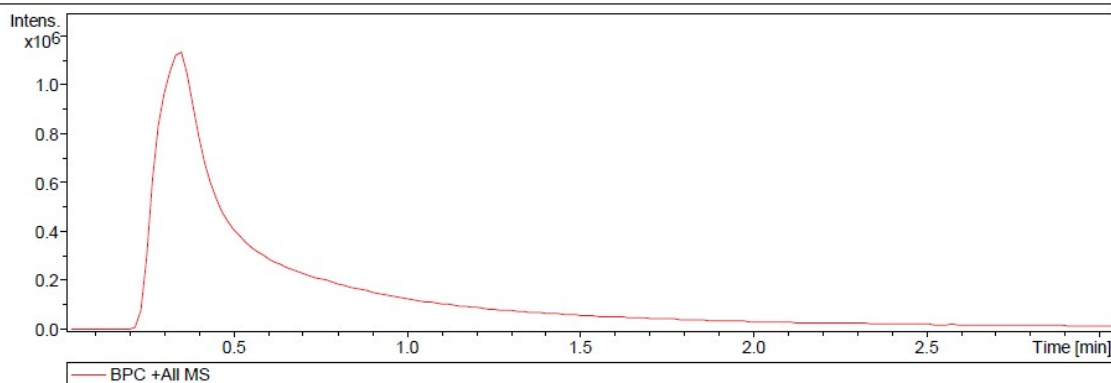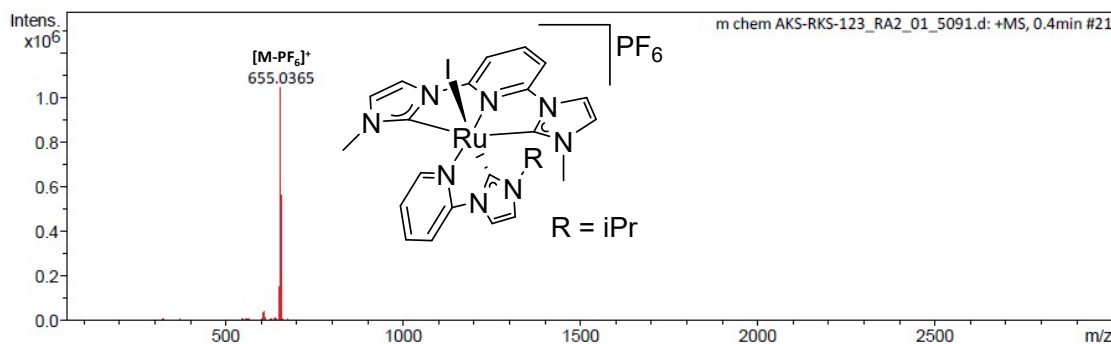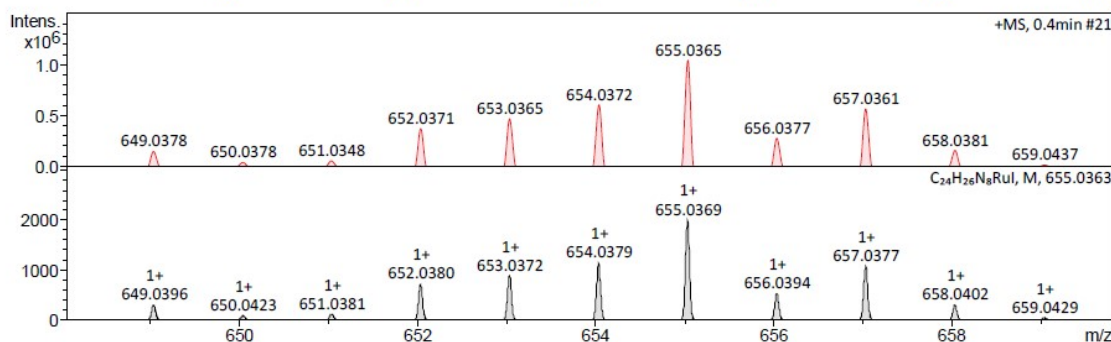

**Figure S40.** LCMS and HRMS of complex **3b**.

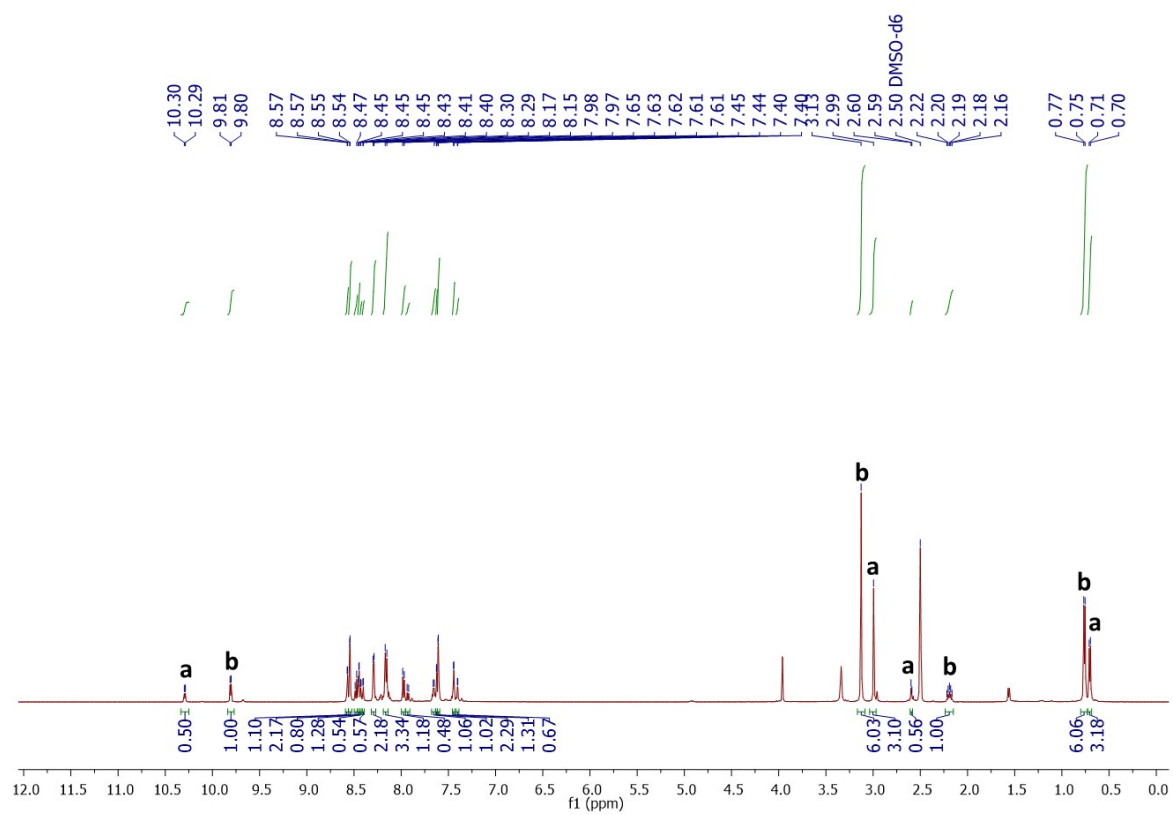

**Figure S41.**  $^1\text{H}$  NMR of complex **3b** in  $\text{DMSO-d}_6$  showing two distinct species **a** (33%) and **b** (67%) in solution.

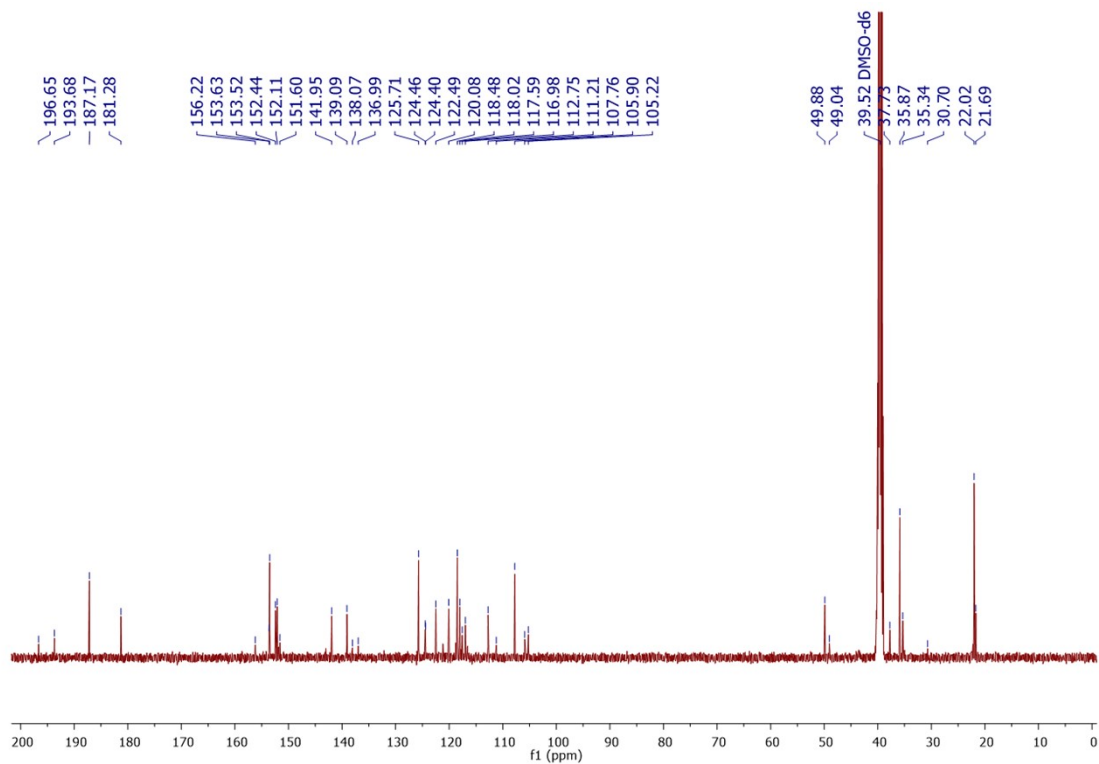

**Figure S42.**  $^{13}\text{C}$  NMR of complex **3b** in  $\text{DMSO-d}_6$  showing two distinct species **a** and **b** in solution.

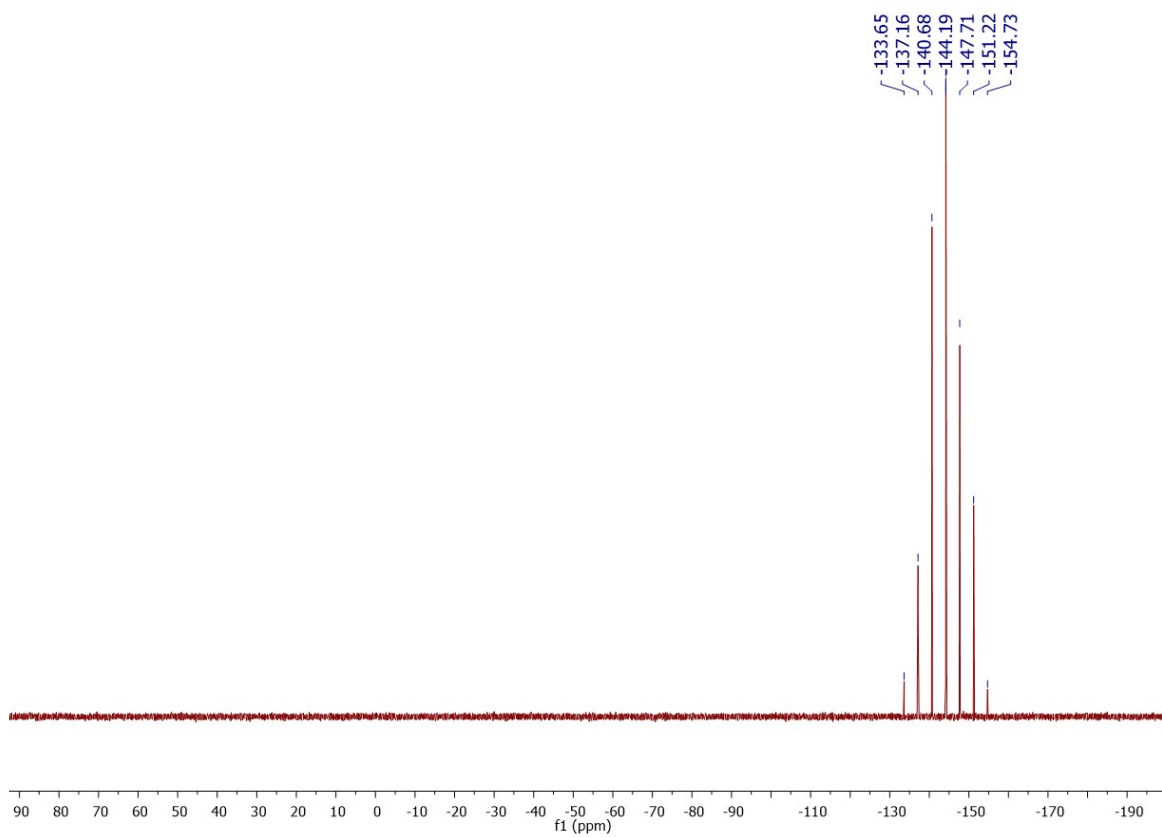

**Figure S43.**  $^{31}\text{P}$  NMR of complex **3b** in  $\text{DMSO-d}_6$ .





## Display Report

### Analysis Info

Analysis Name D:\Data\April 2022\h chem AKS-RKS-191\_RC1\_01\_16671.d  
 Method 2. LCMS tune wide ACN.m  
 Sample Name h chem AKS-RKS-191  
 Comment

Acquisition Date 21-Apr-22 3:36:02 PM

Operator IIT Indore  
 Instrument micrOTOF-Q 228888.10348

### Acquisition Parameter

|             |            |                       |           |                  |           |
|-------------|------------|-----------------------|-----------|------------------|-----------|
| Source Type | ESI        | Ion Polarity          | Positive  | Set Nebulizer    | 2.0 Bar   |
| Focus       | Not active | Set Capillary         | 4500 V    | Set Dry Heater   | 250 °C    |
| Scan Begin  | 50 m/z     | Set End Plate Offset  | -500 V    | Set Dry Gas      | 7.0 l/min |
| Scan End    | 3000 m/z   | Set Collision Cell RF | 650.0 Vpp | Set Divert Valve | Waste     |

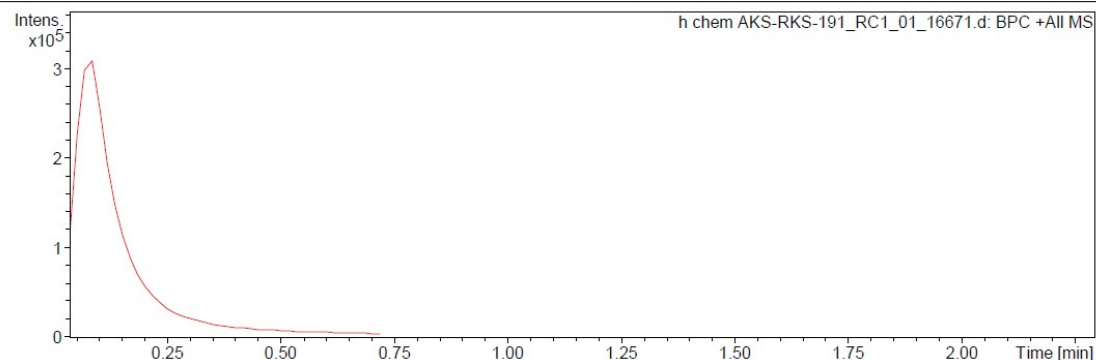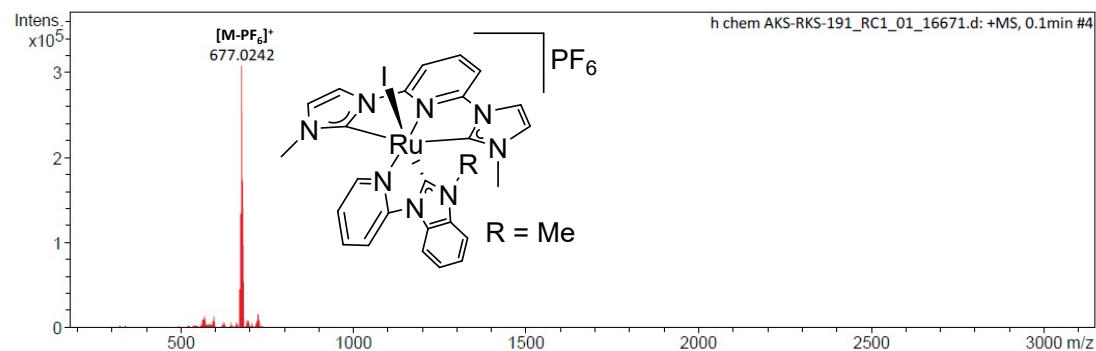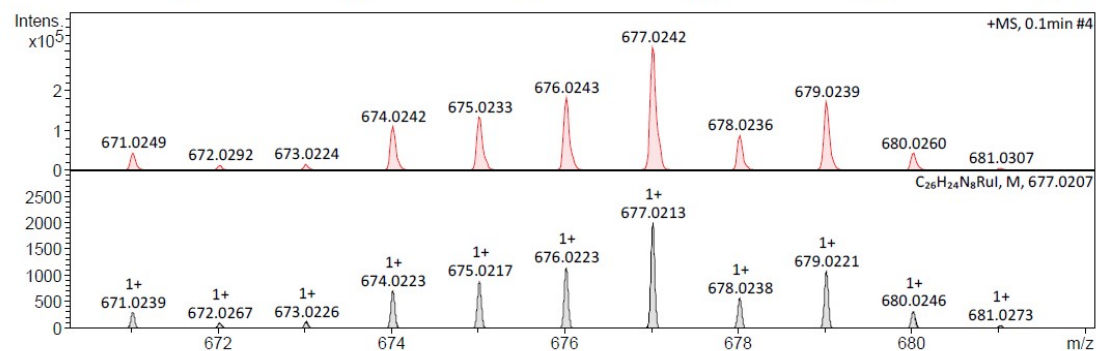

**Figure S44.** LCMS and HRMS of complex **3c**.

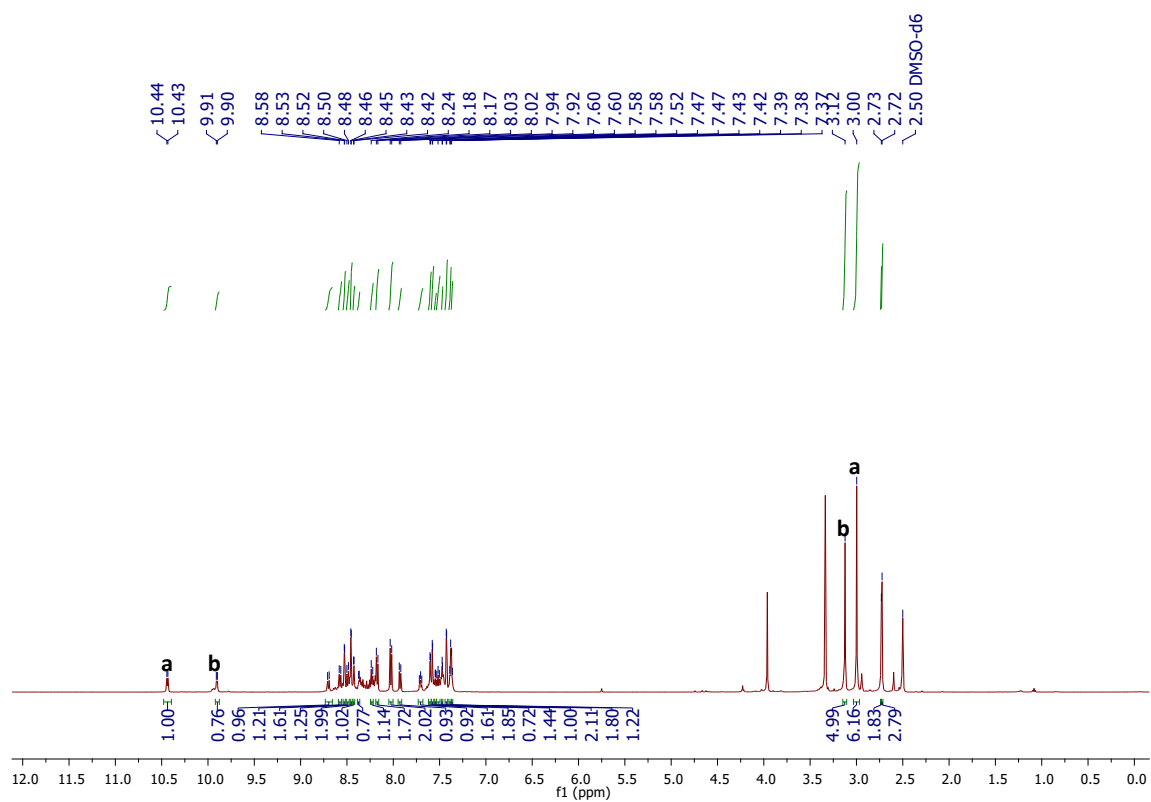

**Figure S45.** <sup>1</sup>H NMR of complex **3c** in DMSO-d<sub>6</sub> showing two distinct species **a** (57%) and **b** (43%) in solution.

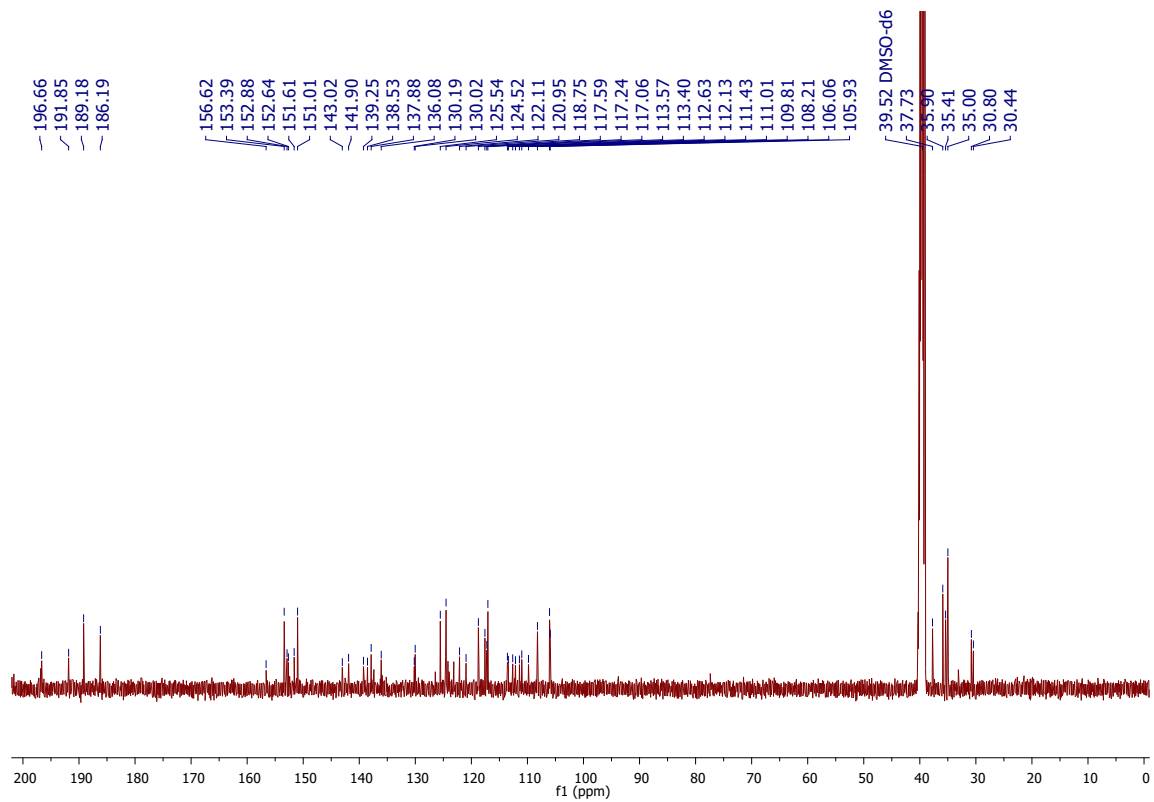

**Figure S46.**  $^{13}\text{C}$  NMR of complex **3c** in  $\text{DMSO-d}_6$  showing two distinct species **a** and **b** in solution.

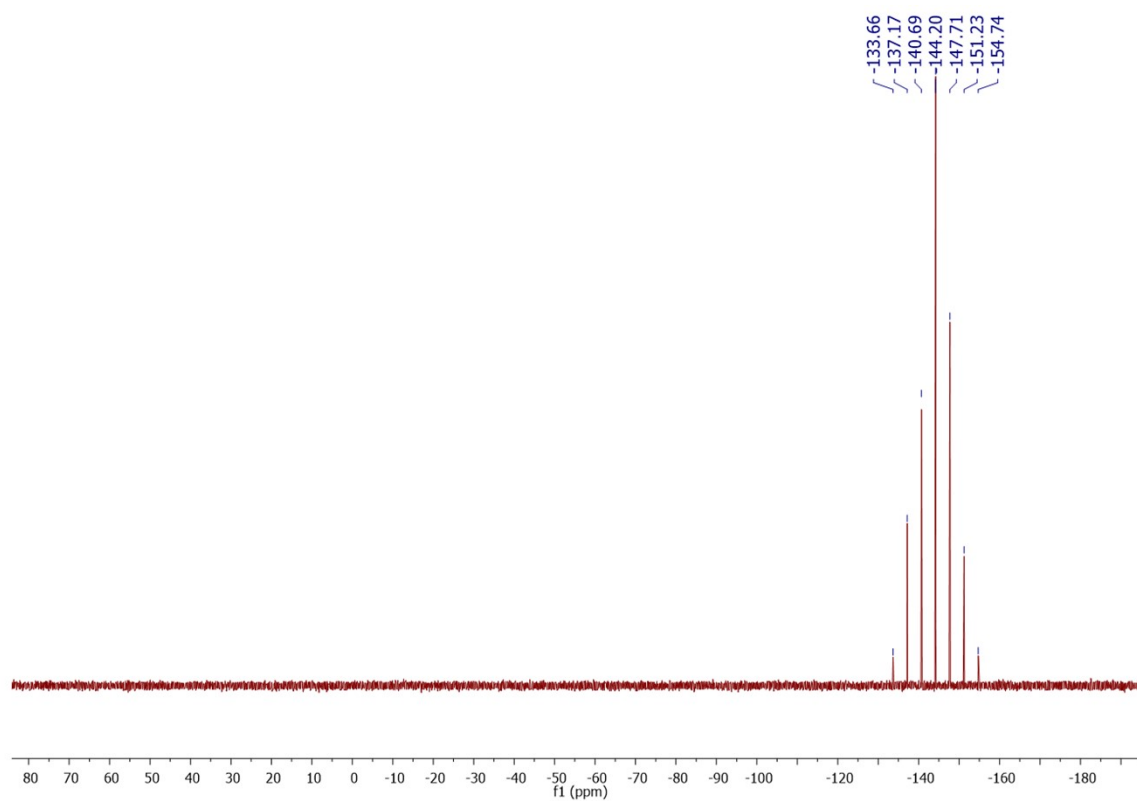

**Figure S47.**  $^{31}\text{P}$  NMR of complex **3c** in  $\text{DMSO-d}_6$ .

## Crystal Structure 3a

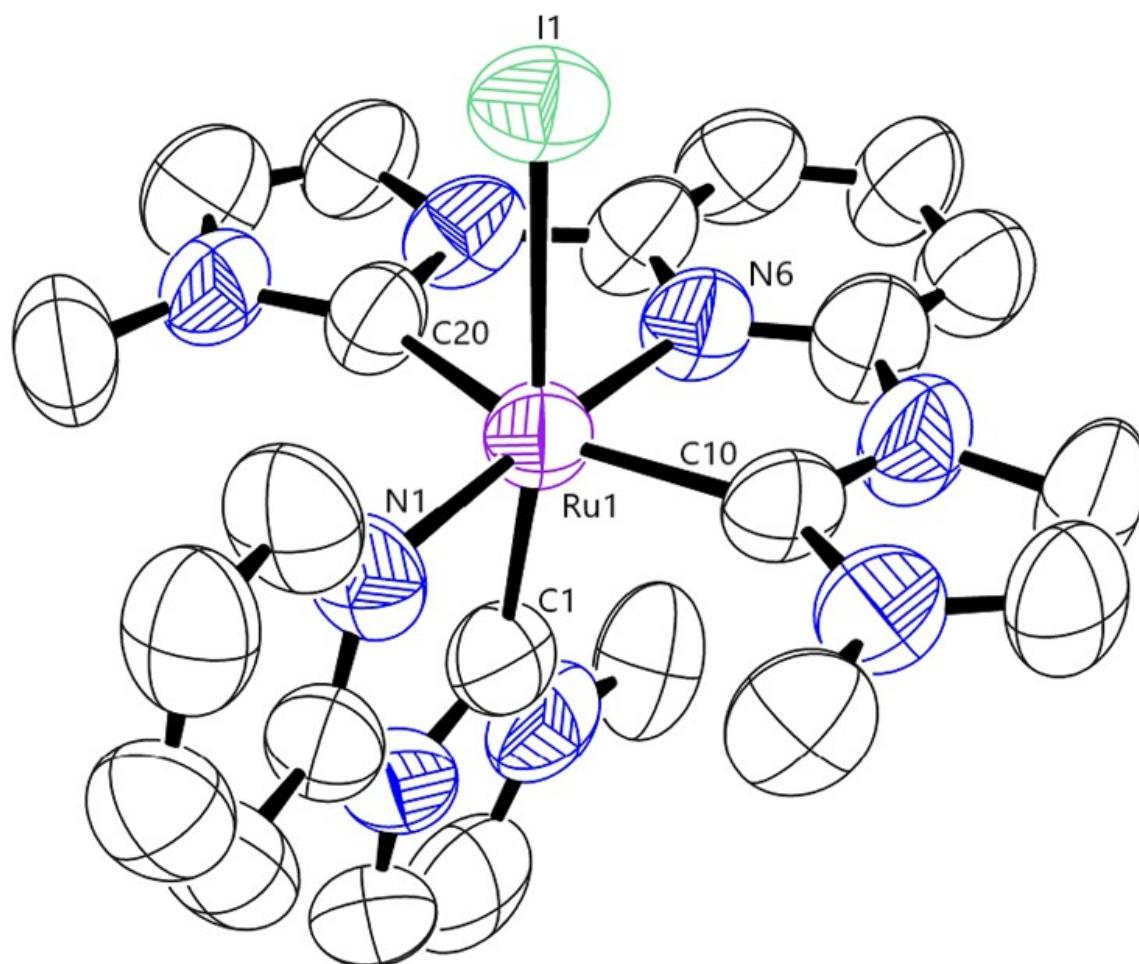

**Figure S48.** ORTEP diagram for complex **3a** obtained from X-ray diffraction. Hydrogen atoms, and one  $\text{PF}_6^-$  anion present in the lattice are omitted for clarity. Ellipsoids are shown at the 50% probability level.

**Table S1.** Crystallographic parameters for complexes **1a**, **1b**, **2c**, and **3a**.

|                                                                                    | <b>1a</b>                                                                  | <b>1b</b>                                                                        | <b>2c</b>                                                                        | <b>3a</b>                                                          |
|------------------------------------------------------------------------------------|----------------------------------------------------------------------------|----------------------------------------------------------------------------------|----------------------------------------------------------------------------------|--------------------------------------------------------------------|
| <b>Empirical formula</b>                                                           | C <sub>12.50</sub> H <sub>14.25</sub> Cl <sub>3</sub> N <sub>4.75</sub> Ru | C <sub>13</sub> H <sub>21</sub> Cl <sub>3</sub> N <sub>3</sub> O <sub>2</sub> Ru | C <sub>55</sub> H <sub>50</sub> Cl <sub>2</sub> N <sub>4</sub> P <sub>2</sub> Ru | C <sub>22</sub> H <sub>22</sub> IF <sub>6</sub> PN <sub>8</sub> Ru |
| <b>Fw/g M<sup>-1</sup></b>                                                         | 438.46                                                                     | 458.75                                                                           | 1028.92                                                                          | 771.41                                                             |
| <b>Crystal system</b>                                                              | monoclinic                                                                 | monoclinic                                                                       | monoclinic                                                                       | monoclinic                                                         |
| <b>Space group</b>                                                                 | <i>P12<sub>1</sub>/n1</i>                                                  | <i>P12<sub>1</sub>/c1</i>                                                        | <i>P12<sub>1</sub>/c1</i>                                                        | <i>P12<sub>1</sub>/c1</i>                                          |
| <b>a/Å</b>                                                                         | 8.1527(5)                                                                  | 10.9711(2)                                                                       | 11.8605(4)                                                                       | 15.0771(5)                                                         |
| <b>b/Å</b>                                                                         | 17.7460(14)                                                                | 11.9322(2)                                                                       | 23.0124(7)                                                                       | 10.9379(5)                                                         |
| <b>c/Å</b>                                                                         | 12.1658(7)                                                                 | 14.5760(3)                                                                       | 19.4293(6)                                                                       | 16.8084(6)                                                         |
| <b>α/°</b>                                                                         | 90                                                                         | 90                                                                               | 90                                                                               | 90                                                                 |
| <b>β/°</b>                                                                         | 104.622(7)                                                                 | 98.992(2)                                                                        | 100.884(4)                                                                       | 104.553(4)                                                         |
| <b>γ/°</b>                                                                         | 90                                                                         | 90                                                                               | 90                                                                               | 90                                                                 |
| <b>V/ Å<sup>3</sup></b>                                                            | 1703.1(2)                                                                  | 1884.68(6)                                                                       | 5207.6(3)                                                                        | 2682.97(19)                                                        |
| <b>Z</b>                                                                           | 4                                                                          | 4                                                                                | 4                                                                                | 4                                                                  |
| <b>T, K</b>                                                                        | 293(2)                                                                     | 293(2)                                                                           | 293(2)                                                                           | 293(2)                                                             |
| <b>ρ<sub>calcd</sub>/Mg m<sup>-3</sup></b>                                         | 1.710                                                                      | 1.617                                                                            | 1.312                                                                            | 1.910                                                              |
| <b>λ/Å (Mo/Cu-Kα)</b>                                                              | 0.7107                                                                     | 0.7107                                                                           | 0.7107                                                                           | 1.54184                                                            |
| <b>Data/restr./param.</b>                                                          | 3327/0/174                                                                 | 3713/0/205                                                                       | 11693/0/543                                                                      | 4767/0/355                                                         |
| <b>F(000)</b>                                                                      | 870                                                                        | 924                                                                              | 2120                                                                             | 1504                                                               |
| <b>GOOF</b>                                                                        | 1.069                                                                      | 1.074                                                                            | 0.990                                                                            | 1.039                                                              |
| <b>R (int)</b>                                                                     | 0.0867                                                                     | 0.0611                                                                           | 0.0858                                                                           | 0.1243                                                             |
| <b>R(F<sub>o</sub>),<sup>a</sup> I &gt; 2 σ(I) [wR(F<sub>o</sub>)<sup>b</sup>]</b> | 0.0555 [0.1346]                                                            | 0.0309 [0.0835]                                                                  | 0.0625 [0.1532]                                                                  | 0.1166 [0.3174]                                                    |
| <b>R (all data) [wR (all data)]</b>                                                | 0.0988 [0.1509]                                                            | 0.0363 [0.0868]                                                                  | 0.1083 [0.1844]                                                                  | 0.1579 [0.3690]                                                    |

**Table S2.** Selected bond lengths and angles for the complexes **1a**, **1b**, **2c**, and **3a**.



Coordinates of optimized geometry of cis/trans isomers of 1a w.r.t solvent molecule (H<sub>2</sub>O/MeCN)

| Complex   | Bond lengths (Å) |            | Bond Angles (°) |            |          |
|-----------|------------------|------------|-----------------|------------|----------|
| <b>1a</b> | Ru1-C1           | 2.002(6)   | C1 Ru1 N1       | 78.1(2)    |          |
|           | Ru1-N1           | 2.043(5)   | C1 Ru1 C11      | 90.26(19)  |          |
|           | Ru1-C11          | 2.3433(19) | C1 Ru1 Cl2      | 88.38(19)  |          |
|           | Ru1-Cl2          | 2.3234(19) | C1 Ru1 Cl3      | 172.35(18) |          |
|           | Ru1-Cl3          | 2.4372(17) | C1 Ru1 N4       | 98.1(2)    |          |
|           | Ru1-N4           | 2.043(6)   | N1 Ru1 C11      | 90.24(15)  |          |
|           |                  |            | N1 Ru1 Cl2      | 89.30(15)  |          |
|           |                  |            | N1 Ru1 Cl3      | 94.39(14)  |          |
|           |                  |            | C11 Ru1 Cl2     | 178.63(7)  |          |
|           |                  |            | C11 Ru1 Cl3     | 91.18(6)   |          |
|           |                  |            | C12 Ru1 Cl3     | 90.15(7)   |          |
|           |                  |            | N4 Ru1 N1       | 176.2(2)   |          |
|           |                  |            | N4 Ru1 C11      | 89.21(16)  |          |
|           |                  |            | N4 Ru1 Cl2      | 91.16(16)  |          |
|           |                  |            | N4 Ru1 Cl3      | 89.42(15)  |          |
|           | <b>1b</b>        | Ru1-C1     | 1.972(2)        | C1 Ru1 N1  | 78.32(9) |
|           |                  | Ru1-C11    | 2.3399(7)       | C1 Ru1 C11 | 89.71(8) |
| Ru1-Cl2   |                  | 2.3441(7)  | C1 Ru1 Cl2      | 93.33(8)   |          |
| Ru1-Cl3   |                  | 2.3501(7)  | C1 Ru1 Cl3      | 103.01(7)  |          |
| Ru1-O1    |                  | 2.2259(18) | C1 Ru1 O1       | 169.35(9)  |          |
| Ru1-N1    |                  | 2.073(2)   | N1 Ru1 C11      | 87.99(6)   |          |
|           |                  |            | N1 Ru1 Cl2      | 89.05(6)   |          |
|           |                  |            | N1 Ru1 Cl3      | 178.66(6)  |          |
|           |                  |            | C11 Ru1 Cl2     | 175.25(3)  |          |
|           |                  |            | C11 Ru1 Cl3     | 92.21(3)   |          |
|           |                  |            | C12 Ru1 Cl3     | 90.66(3)   |          |
|           |                  |            | O1 Ru1 N1       | 92.30(8)   |          |
|           |                  |            | O1 Ru1 C11      | 84.88(5)   |          |
|           |                  | O1 Ru1 Cl2 | 91.52(5)        |            |          |
|           |                  | O1 Ru1 Cl3 | 86.40(5)        |            |          |
| <b>2c</b> | Ru1-C1           | 1.951(4)   | C1 Ru1 N1       | 78.66(16)  |          |
|           | Ru1-N1           | 2.079(3)   | C1 Ru1 P1       | 90.89(12)  |          |
|           | Ru1-P1           | 2.3847(11) | C1 Ru1 P2       | 90.96(12)  |          |
|           | Ru1-P2           | 2.4159(11) | C1 Ru1 C11      | 170.80(13) |          |
|           | Ru1-Cl1          | 2.4853(10) | C1 Ru1 N4       | 97.25(16)  |          |
|           | Ru1-N4           | 2.045(4)   | N1 Ru1 P1       | 91.58(9)   |          |
|           |                  |            | N1 Ru1 P2       | 89.20(9)   |          |
|           |                  |            | N1 Ru1 C11      | 92.17(9)   |          |
|           |                  |            | C11 Ru1 P1      | 90.17(4)   |          |
|           |                  |            | C11 Ru1 P2      | 88.07(4)   |          |
|           |                  |            | C11 Ru1 N4      | 92.17(9)   |          |
|           |                  |            | N4 Ru1 N1       | 175.61(13) |          |
|           |                  |            | N4 Ru1 P1       | 86.87(11)  |          |
|           |                  |            | N4 Ru1 P2       | 92.47(11)  |          |
|           |                  | N4 Ru1 C11 | 91.93(10)       |            |          |
| <b>3a</b> | Ru1-C10          | 2.041(12)  | C10 Ru1 N6      | 76.9(5)    |          |
|           | Ru1-C20          | 2.053(15)  | C10 Ru1 C20     | 154.7(6)   |          |
|           | Ru1-C1           | 2.001(13)  | C10 Ru1 C1      | 89.7(6)    |          |
|           | Ru1-N6           | 2.002(11)  | C10 Ru1 N1      | 104.3(5)   |          |
|           | Ru1-N1           | 2.111(12)  | C10 Ru1 I1      | 86.8(3)    |          |
|           | Ru1-I1           | 2.8185(14) | N6 Ru1 C20      | 77.8(5)    |          |
|           |                  |            | N6 Ru1 C1       | 98.6(6)    |          |
|           |                  |            | N6 Ru1 I1       | 87.9(3)    |          |
|           |                  |            | C20 Ru1 C1      | 94.6(6)    |          |
|           |                  |            | C20 Ru1 N1      | 101.0(6)   |          |
|           |                  |            | C20 Ru1 I1      | 91.8(4)    |          |
|           |                  | C1 Ru1 N1  | 77.5(6)         |            |          |
|           |                  | C1 Ru1 I1  | 171.8(5)        |            |          |
|           |                  | N1 Ru1 I1  | 96.1(4)         |            |          |
|           |                  | N1 Ru1 N4  | 175.8(5)        |            |          |

DFT data of **1a-transH<sub>2</sub>O**

M06L

-----  
GIBBS FREE ENERGY  
-----

The Gibbs free energy is  $G = H - T*S$

Total enthalpy ... -2063.55822234 Eh

Total entropy correction ... -0.06592410 Eh -41.37 kcal/mol

-----  
Final Gibbs free energy ... -2063.62414644 Eh

For completeness - the Gibbs free energy minus the electronic energy

G-E(el) ... 0.15272180 Eh 95.83 kcal/mol

PBE0

-----  
FINAL SINGLE POINT ENERGY -2063.917404824662  
-----

XYZ coordinates

|    |                   |                   |                   |
|----|-------------------|-------------------|-------------------|
| Ru | -0.71837612082331 | -0.21459601135461 | -0.25882519044137 |
| Cl | -2.54899603233529 | -1.83268568088878 | -0.52644359964250 |
| Cl | -1.92569642403652 | 1.57780558042384  | -1.31990324829772 |
| Cl | 0.86026867236543  | -1.87506052439103 | 0.36733036205501  |
| N  | 1.80418097989906  | 1.64475849055771  | -0.50609234605528 |
| O  | -0.40838030835742 | -0.83020221326230 | -2.39622431009464 |
| N  | -1.12048317880486 | 0.34958667279730  | 1.66382472231000  |
| N  | 0.71375259851873  | 1.67884313666868  | 1.36209211111442  |
| C  | 0.72560874906069  | 1.10656986720982  | 0.10764687124256  |
| C  | 2.45371667576533  | 2.53674570588745  | 0.33931716647388  |
| C  | 1.77405760930203  | 2.56379823110582  | 1.51900344132573  |
| C  | 2.19528642046651  | 1.30763433632320  | -1.86613589856345 |
| C  | -2.37881255670430 | 0.28703821945718  | 3.70126301626277  |
| C  | -2.14776273971349 | -0.13505355007181 | 2.39803955983990  |
| H  | -2.77545548072180 | -0.87794699415896 | 1.89037871581428  |
| H  | 3.34841483723994  | 3.07874794323081  | 0.03369682706928  |
| H  | 1.96111659207695  | 3.12704467364483  | 2.43163676831418  |

|   |                   |                   |                   |
|---|-------------------|-------------------|-------------------|
| H | 3.17606082541185  | 1.75067818209133  | -2.08628718984262 |
| H | 2.25738630415627  | 0.21405181698757  | -1.97546456873693 |
| H | 1.45490685902275  | 1.69358666528258  | -2.58546363641726 |
| C | -1.52961135668848 | 1.23852575423752  | 4.27708693093821  |
| C | -0.29804709431495 | 1.27259419125793  | 2.22881326503967  |
| C | -0.46863950194050 | 1.74334667827710  | 3.52994592271325  |
| H | 0.21729195752453  | 2.48833214156932  | 3.94514209791645  |
| H | -1.69168448916520 | 1.58620680351320  | 5.30301860912568  |
| H | -3.22220389757170 | -0.13302173688943 | 4.25749446279321  |
| H | -1.03004232679567 | -0.19726844125817 | -2.81157817476229 |
| H | -0.93481757283658 | -1.65812993824816 | -2.35188268749442 |

#### DFT data of **1a-cisH<sub>2</sub>O**

M06L

-----  
GIBBS FREE ENERGY  
-----

The Gibbs free energy is  $G = H - T \cdot S$

|                          |     |                   |                 |
|--------------------------|-----|-------------------|-----------------|
| Total enthalpy           | ... | -2063.56671223 Eh |                 |
| Total entropy correction | ... | -0.06601080 Eh    | -41.42 kcal/mol |
| -----                    |     |                   |                 |
| Final Gibbs free energy  | ... | -2063.63272303 Eh |                 |

For completeness - the Gibbs free energy minus the electronic energy  
G-E(el)                    ...    0.15256295 Eh    95.73 kcal/mol

PBE0

-----  
FINAL SINGLE POINT ENERGY    -2063.923842037005  
-----

XYZ coordinates

|    |                   |                   |                   |
|----|-------------------|-------------------|-------------------|
| Ru | -0.85526421274169 | -0.15213323581588 | -0.13108387150991 |
| Cl | -0.56991369923285 | -0.86696981654868 | -2.38170587228694 |
| Cl | -2.47078120834026 | 1.51602168266777  | -0.71897128102432 |
| Cl | 0.32510774954272  | -2.01021388289319 | 0.74627146849665  |

|   |                   |                   |                   |
|---|-------------------|-------------------|-------------------|
| N | 1.65056119221117  | 1.59216397512193  | -0.58676066018054 |
| O | -2.75688568495256 | -1.54298701223137 | -0.32218443875065 |
| N | -1.12893863636932 | 0.45396168272929  | 1.88163735794808  |
| N | 0.72667067596543  | 1.67469401951757  | 1.37863312935986  |
| C | 0.60993084214555  | 1.07771647908703  | 0.12390319841249  |
| C | 2.38706365448391  | 2.47606835935774  | 0.19370527881965  |
| C | 1.81825719055024  | 2.53540867045420  | 1.42610309938531  |
| C | 1.95447862796159  | 1.26558055109475  | -1.97296472865654 |
| C | -2.19256209405049 | 0.46164409598198  | 4.02175930228146  |
| C | -2.09827582688875 | 0.02281194988589  | 2.70612146816696  |
| H | -2.80453277190717 | -0.69814790823033 | 2.27716419450347  |
| H | 3.26269167629377  | 2.99332381980415  | -0.19775255594614 |
| H | 2.09665747021637  | 3.10741455982846  | 2.30934874659193  |
| H | 2.84511397392343  | 1.83031086666787  | -2.28236256867110 |
| H | 2.14503797377561  | 0.18733261362705  | -2.08348234492063 |
| H | 1.10797607646634  | 1.52682107448542  | -2.62602868267773 |
| C | -1.24575215034035 | 1.37784934978685  | 4.49636897668267  |
| C | -0.21307188329231 | 1.33443592084826  | 2.34169377208065  |
| C | -0.23612012767279 | 1.82608622629606  | 3.65031411185551  |
| H | 0.51966942436319  | 2.53871120437699  | 3.99478515573107  |
| H | -1.29298218170102 | 1.74181341621115  | 5.52868021784787  |
| H | -2.99552444932757 | 0.08844253134462  | 4.66414743059392  |
| H | -3.30900319747222 | -0.90621332693457 | -0.81560887794157 |
| H | -2.42479840360994 | -2.13990786652099 | -1.01855102619150 |

DFT data of **1a-transMeCN**

M06L

-----  
GIBBS FREE ENERGY

-----  
The Gibbs free energy is  $G = H - T \cdot S$

Total enthalpy                   ... -2119.81574733 Eh  
Total entropy correction       ... -0.07095122 Eh -44.52 kcal/mol

Final Gibbs free energy ... -2119.88669854 Eh

For completeness - the Gibbs free energy minus the electronic energy  
G-E(el) ... 0.17139142 Eh 107.55 kcal/mol

PBE0

-----  
FINAL SINGLE POINT ENERGY -2120.181937998441  
-----

XYZ coordinates

|    |                   |                   |                   |
|----|-------------------|-------------------|-------------------|
| Ru | -0.63797233189048 | -0.38791521827584 | -0.23153380221345 |
| Cl | -2.43637641388630 | -2.03141832189905 | -0.27473163215507 |
| Cl | -1.93278512200531 | 1.38908223760102  | -1.21091893779213 |
| Cl | 1.04678752559797  | -1.90180468714474 | 0.57574746369130  |
| N  | 1.76476325397342  | 1.64913084254578  | -0.53829407846366 |
| N  | -0.24661564967592 | -1.04786661456889 | -2.10087822688204 |
| N  | -1.09621110220906 | 0.25646901357356  | 1.71301674167771  |
| C  | -0.12510431527409 | -2.20288208587972 | -4.43025668302539 |
| N  | 0.66668227321204  | 1.66897655222433  | 1.32172521093403  |
| C  | 0.73335500980847  | 1.04612190356866  | 0.09580725009326  |
| C  | 2.33344057486089  | 2.62953334106921  | 0.26722020101613  |
| C  | 1.64598703304460  | 2.64742837070957  | 1.44164333181265  |
| C  | 2.18858705525773  | 1.29768275330902  | -1.88268711328661 |
| C  | -0.17814848724894 | -1.55293994239440 | -3.14258397196305 |
| C  | -2.33506696597461 | 0.24493522067725  | 3.76286297656971  |
| C  | -2.08768005289930 | -0.23737937059642 | 2.48177818163191  |
| H  | -2.67766619039436 | -1.04000505605525 | 2.01921700883664  |
| H  | 3.17956838456626  | 3.23294881659422  | -0.06066781270917 |
| H  | 1.77656963000580  | 3.26520628318943  | 2.32838929642242  |
| H  | 3.04955448545224  | 1.91710582033994  | -2.16956015930670 |
| H  | 2.47982441752645  | 0.23582968601140  | -1.92151854505142 |
| H  | 1.36668393166051  | 1.46980111105134  | -2.59614542098389 |
| H  | -0.59073492301441 | -1.57085918023401 | -5.20300626194646 |
| H  | 0.91460056039057  | -2.41148036250206 | -4.72851759934474 |

|   |                   |                   |                   |
|---|-------------------|-------------------|-------------------|
| H | -0.67232528359645 | -3.15851084462864 | -4.39218606069573 |
| C | -1.53583652779710 | 1.27161582263391  | 4.27351607678366  |
| C | -0.32457979176440 | 1.24878364822180  | 2.21399829262588  |
| C | -0.50813180800347 | 1.78723994236530  | 3.48741112138209  |
| H | 0.13867244764376  | 2.59052763140272  | 3.85383932053450  |
| H | -1.70920383290577 | 1.67085047965870  | 5.27895095959171  |
| H | -3.15113778446074 | -0.18620779256819 | 4.35086287221590  |

DFT data of **1a-cisMeCN**

M06L

-----  
GIBBS FREE ENERGY  
-----

The Gibbs free energy is  $G = H - T \cdot S$

Total enthalpy ... -2119.81736903 Eh

Total entropy correction ... -0.07163203 Eh -44.95 kcal/mol

-----  
Final Gibbs free energy ... -2119.88900106 Eh

For completeness - the Gibbs free energy minus the electronic energy

G-E(el) ... 0.17055597 Eh 107.03 kcal/mol

PBE0

----- FINAL SINGLE POINT ENERGY -2120.181137445548  
-----

|    |                   |                   |                   |
|----|-------------------|-------------------|-------------------|
| Ru | -0.81394724398615 | -0.29273095830890 | -0.09791471724466 |
| Cl | -0.38086604663995 | -1.00431085136015 | -2.32219363572755 |
| Cl | -2.38071912989713 | 1.39913513953738  | -0.74736194577259 |
| Cl | 0.48114193099840  | -2.03775942381082 | 0.90933052186057  |
| N  | 1.66204348294775  | 1.53762667785858  | -0.59299430108419 |
| N  | -2.46454905323057 | -1.73961353569940 | -0.23944818707897 |
| N  | -1.13311514163423 | 0.40373293541905  | 1.89567068831722  |
| C  | -4.17561385283049 | -3.55150436851901 | -0.99018526873194 |
| N  | 0.69578156311697  | 1.65701119750959  | 1.34544883071666  |

|   |                   |                   |                   |
|---|-------------------|-------------------|-------------------|
| C | 0.62587617996321  | 1.00925934037750  | 0.11272133470740  |
| C | 2.35060731324281  | 2.47610242476626  | 0.16762746458515  |
| C | 1.75409567931876  | 2.55926531978722  | 1.38422313913595  |
| C | 2.01549652332359  | 1.18268682774974  | -1.96056142385465 |
| C | -3.23332117913622 | -2.54503451335384 | -0.56029395704991 |
| C | -2.22491083484546 | 0.51732166298709  | 4.02211336774817  |
| C | -2.10115462248219 | 0.00452028963979  | 2.73596510795247  |
| H | -2.79005283454844 | -0.75309950910350 | 2.34516200565746  |
| H | 3.21580824213191  | 3.00913787228781  | -0.22581371078898 |
| H | 1.99339309788337  | 3.17217114383999  | 2.25122397522345  |
| H | 2.89353767395274  | 1.77213789527573  | -2.26115607529139 |
| H | 2.24524546883035  | 0.10941365607960  | -2.03408824059516 |
| H | 1.17788206332196  | 1.39134620540713  | -2.64268621467911 |
| H | -3.79940317764162 | -4.55807765632397 | -0.74885504814339 |
| H | -5.15219133194009 | -3.41387314481569 | -0.50016479079075 |
| H | -4.32139546362574 | -3.48791417635776 | -2.08030006194072 |
| C | -1.30633268370115 | 1.48255845194556  | 4.45147656365048  |
| C | -0.24840580258687 | 1.33559465583196  | 2.31117125628534  |
| C | -0.29989308237944 | 1.90356311034866  | 3.58863352997499  |
| H | 0.43174469878897  | 2.65665234063050  | 3.89691365606049  |
| H | -1.37462809187321 | 1.90738938760440  | 5.45909874560716  |
| H | -3.02841434484182 | 0.16486160276949  | 4.67559739129096  |
